# Supplementary material for: Modeling using clinical examination indicators predicts interstitial lung disease among patients with rheumatoid arthritis
Source: PeerJ. 2017 Feb 21;5:e3021. doi: 10.7717/peerj.3021 (PMC5322753; doi:10.7717/peerj.3021)
Supplement: Table S1 [file peerj-05-3021-s001.xlsx]

## Sheet: Sheet1
Table S1. Clinical examination results for the 620 patients included in this study.
Patient number	Lung status	gender (male/female: 0/1)	age (year)	U-SG (urine specific gravity)	U-PH (urine PH)	U-RBC ( urine red blood cell count, /μL)	U-WBC (urine white blood cell count, /μL)	U-EC (urine epithelial cell count, /μL)	U-RBCH (urine red blood cell (high power field), /HPF)	U-WBCH (urine white blood cell (high power field), /HPF)	U-ECH ( urine epithelial cells (high power field), /HPF)	WBC (white blood cell count, 109/L)	NEUT% (neutrophil percentage, %)	LYMPH% (lymphocytes percentage, %)	MONO% (monocytes percentage, %)	EO% (eosinophil percentage, %)	BASO% (basophil percentage, %)	NEUT (neutrophil count, 109/L)	LYMPH (lymphocyte count 109/L)	MONO (monocyte count, 109/L)	EO (eosinophil count, 109/L)	BASO (basophil count 109/L)	HGB (hemoglobin, g/L)	RBC (red blood cell count, 1012/L)	HCT (hematocrit %)	MCV (mean corpuscular volume, fL)	MCH (mean corpuscular hemoglobin, pg)	MCHC (mean corpuscular-hemoglobin concentration, g/L)	RDW (red blood cell volume distribution width, %)	PLT (blood platelet count, 109/L)	MPV (mean platelet volume, fL)	PDW (platelet distribution width, %)	PCT (thrombocytocrit, %)
P001	Healthy	1	35	1.025	6	15.6	8.7	76.3	3	2	14	5.7	56.8	30	6.7	5.6	0.9	3.25	1.72	0.38	0.32	0.05	125	4.23	37.2	87.9	29.4	335	10	157	8.5	15.3	0.132
P002	Healthy	0	56	1.012	7.5	3.5	1.5	0.8	1	0	0	15.5	78.9	12.1	5.7	0.8	2.5	12.23	1.88	0.88	0.12	0.39	161	5.04	50	99.2	32	323	10.1	399	7.7	11.8	0.307
P003	Healthy	1	50	1.018	6	12	3.1	1.9	2	1	0	8.8	70.1	16.4	7.6	4.8	1.1	6.15	1.44	0.67	0.42	0.1	122	4.21	37.2	88.3	28.9	327	10.8	318	7.8	13	0.248
P004	Healthy	1	56	1.01	5.5	2	1	0.5	0	0	0	4.4	48.3	43.7	5.9	1.6	0.5	2.13	1.92	0.26	0.07	0.02	117	4.11	35.9	87.4	28.4	325	10.9	195	7.4	12.8	0.144
P005	Healthy	1	82	1.009	7	2.1	25.8	34.6	0	5	6	8.7	68.5	16.5	7.5	6.8	0.7	5.96	1.44	0.65	0.59	0.06	110	3.89	34.6	88.8	28.2	318	11.4	215	9	17.3	0.193
P006	Healthy	1	62	1.007	7	0.9	1.5	1.8	0	0	0	3.9	47.2	36	14.7	1.4	0.7	1.85	1.41	0.58	0.05	0.03	82	3.05	25.8	84.7	26.9	317	11.5	279	6.9	10.3	0.193
P007	Healthy	1	38	1.02	5.5	627.5	16.5	11.2	113	3	2	6	61.1	28.8	8.3	1.3	0.5	3.66	1.73	0.5	0.08	0.03	82	2.97	26	87.5	27.5	315	11.8	411	6	8	0.247
P008	Healthy	1	39	1.016	6.5	24.8	239.1	78.6	4	43	14	6.3	77.2	16.1	5.6	0.5	0.6	4.84	1.01	0.35	0.03	0.04	112	4.3	34.8	81.1	26.1	322	12.4	251	7.6	12	0.189
P009	Healthy	1	47	1.02	6.5	12.3	2.8	2.1	2	1	0	6.1	78.4	15	5.4	1	0.2	4.77	0.91	0.33	0.06	0.01	133	4.45	41.5	93.3	29.9	320	12.6	298	10.5	11.9	0.31
P010	Healthy	0	57	1.007	6.5	2.5	3	2	0	1	0	7.2	62.4	23.1	7.8	6.4	0.3	4.48	1.66	0.56	0.46	0.02	133	4.43	39.6	89.4	30	336	12.8	243	10	11.4	0.24
P011	Healthy	1	41	1.003	5.5	0.9	9.8	8.8	0	2	2	5.1	68	23.4	5.2	2.7	0.7	3.49	1.2	0.27	0.14	0.04	83	3.72	26.3	70.8	22.4	317	13.2	501	7.8	13.8	0.391
P012	Healthy	1	53	1.014	6	11.2	35	33.4	2	6	6	6.1	54.8	34	6.4	3.7	1.1	3.36	2.09	0.39	0.23	0.07	122	4.11	37.8	91.9	29.6	323	13.2	363	6.7	9	0.241
P013	Healthy	1	52	1.014	5	19.6	36.5	2.9	4	7	1	17.2	81.5	9.4	5.5	1.9	1.7	14.02	1.62	0.95	0.33	0.29	68	3.23	21.4	66.2	21.1	318	13.3	521	6.9	0	0.36
P014	Healthy	1	45	1.012	6	10.3	42.1	21.1	2	8	4	5.3	62.8	25.4	9.4	1.6	0.8	3.32	1.34	0.5	0.08	0.04	87	3.43	27.5	80.2	25.3	316	13.3	321	7.4	11	0.239
P015	Healthy	0	52	1.018	6.5	2.6	17.1	7	0	3	1	8.5	76.7	18.3	4.6	0.2	0.2	6.53	1.56	0.39	0.02	0.02	150	5.1	46.1	90.4	29.4	325	13.5	155	11.7	14.5	0.18
P016	Healthy	1	16	1.028	6	3.6	230.7	61.3	1	42	11	7.2	54.6	35.2	7.2	2.1	0.9	3.93	2.53	0.52	0.15	0.06	112	5.59	37.3	66.8	20	299	13.6	487	8.2	0	0.399
P017	Healthy	1	43	1.012	6	5.4	8.1	11.5	1	1	2	7.4	80.4	14.5	3.9	1.2	0	5.98	1.08	0.29	0.09	0	94	3.8	30.7	80.8	24.7	306	13.8	410	9.2	9.7	0.38
P018	Healthy	1	55	1.015	6.5	24.8	306.7	17.5	4	55	3	6.4	66.9	23.8	7.2	1.9	0.2	4.25	1.51	0.46	0.12	0.01	112	4.03	35	86.8	27.8	320	14	278	8.9	9.2	0.25
P019	Healthy	0	69	1.018	7	7.6	9.1	7.4	1	2	1	8.9	66.6	23.9	7.7	1.6	0.2	5.95	2.14	0.69	0.14	0.02	145	4.65	43.7	94	31.2	332	14.2	367	10.7	12.4	0.39
P020	Healthy	1	33	1.01	7	1.5	2.2	2.8	0	0	1	6.5	67.7	19.1	9.7	2.7	0.8	4.39	1.24	0.63	0.17	0.05	82	3.72	26.4	71	22.1	311	14.4	481	9	16	0.431
P021	Healthy	1	57	1.016	6	9.1	57.2	27.7	2	10	5	6.9	54.6	35.5	7.2	1.9	0.8	3.76	2.44	0.5	0.13	0.06	124	4.06	38.1	93.6	30.6	327	9.1	213	8.3	14.5	0.177
P022	Healthy	1	42	1.013	6	11.2	74.6	26.9	2	13	5	5.3	75.6	19.4	4.4	0.6	0	3.97	1.02	0.23	0.03	0	74	2.78	24.6	88.5	26.6	301	14.8	691	9.6	10.6	0.67
P023	Healthy	1	61	1.009	5	33.2	10.1	8.5	6	2	2	9.3	74.2	19.6	4.6	1.4	0.2	6.91	1.83	0.43	0.13	0.02	102	3.71	32.7	88.1	27.5	312	14.9	352	9.5	10.4	0.33
P024	Healthy	1	46	1.012	6.5	6.5	3.4	4.1	1	1	1	6.9	68.9	21.9	6.8	1.7	0.7	4.75	1.51	0.47	0.12	0.05	76	3.7	25.3	68.5	20.5	300	14.9	455	7.7	0	0.349
P025	Healthy	1	63	1.012	6.5	5.4	2	13.2	1	0	2	5.5	42.2	46.6	10.3	0.7	0.2	2.33	2.57	0.57	0.04	0.01	85	2.85	26.8	94	29.8	317	15	231	9.3	10.3	0.22
P026	Healthy	1	43	1.011	7.5	2.1	1.4	25.9	0	0	5	4.2	48.3	38.8	12.7	0	0.2	2.01	1.62	0.53	0	0.01	98	3.5	31	88.6	28	316	15.1	203	11.4	12.6	0.23
P027	Healthy	1	19	1.015	6.5	12	1.2	2.5	2	0	0	4.7	59.4	29.2	9.5	1.7	0.2	2.76	1.36	0.44	0.08	0.01	110	4	34.4	86	27.5	320	15.1	251	10.7	13	0.27
P028	Healthy	1	17	1.001	6	11.8	3.8	6.8	2	1	1	6.2	70	20.2	7.5	2.3	0	4.31	1.24	0.46	0.14	0	102	3.9	32.8	84.1	26.2	311	15.4	481	10.5	11.9	0.5
P029	Healthy	1	48	1.013	6.5	0.8	0.8	0.9	0	0	0	10.5	81.4	13.1	5.2	0.2	0.1	8.55	1.38	0.55	0.02	0.01	107	4.06	34.6	85.2	26.4	309	16.2	315	10.4	12.1	0.33
P030	Healthy	1	65	1.013	6.5	10.4	15	9	2	3	2	10.8	79.9	12	7.2	0.8	0.1	8.66	1.3	0.78	0.09	0.01	83	3.16	26.4	83.5	26.3	314	17.9	550	8.1	7.9	0.44
P031	Healthy	1	42	1.016	5.5	5.6	32.1	40.4	1	6	7	6.7	48.9	39.6	8.2	3	0.3	3.3	2.67	0.55	0.2	0.02	97	4.26	31.6	74.2	22.8	307	19	333	10.8	16.6	0.36
P032	Healthy	1	60	1.013	7	1.8	1.1	2.3	0	0	0	4.6	45.6	39.8	7.5	5.8	1.3	2.1	1.83	0.35	0.27	0.06	139	4.46	42	94.2	31.2	331	9	237	7.4	11.8	0.176
P033	Healthy	1	58	1.006	6	1.2	0.4	0.2	0	0	0	6.7	70.4	22	4.2	2.7	0.7	4.7	1.47	0.28	0.18	0.05	126	4.06	38.7	95.3	30.9	325	9.6	287	8.3	12.5	0.239
P034	Healthy	0	48	1.008	7	3	8	1.6	1	1	0	5.3	48.4	37.2	11.2	1.8	1.4	2.56	1.97	0.59	0.1	0.07	147	4.38	44	100.3	33.4	333	9.7	222	8.7	15.5	0.193
P035	Healthy	0	54	1.013	6	1.4	3	0.7	0	1	0	5.3	44.4	34.8	13.2	6.4	1.2	2.33	1.83	0.69	0.34	0.06	138	4.26	41.8	98	32.2	329	9.8	226	7.6	11.8	0.17
P036	Healthy	1	59	1.02	7	2.8	3.7	5.6	0.5	0.7	1	9.2	67.2	18.5	11.4	2.7	0.2	6.15	1.69	1.04	0.25	0.02	97	3.69	31.1	84.3	26.3	312	16.1	419	9.7	10.7	0.41
P037	Healthy	1	46	1.023	6	6.3	54.4	69.1	1	10	12	9	63.8	27.2	4.8	4	0.2	5.77	2.46	0.43	0.36	0.02	133	4.47	41.3	92.4	29.8	322	12.7	283	9.9	11.6	0.28
P038	Healthy	1	75	1.014	6	22.3	84.5	16	4	15.2	2.9	5.5	72.2	16.1	9	1.5	0.2	3.99	0.88	0.49	0.06	0.01	91	3.32	28.4	85.5	27.4	320	13.6	251	9.7	11	0.24
P039	Healthy	1	54	1.017	6.5	13.7	853.4	16.1	2.5	163.6	2.9	7.3	73.6	18.6	6.8	1	0.1	5.39	1.36	0.5	0.07	0.01	108	3.93	34.5	87.8	27.5	313	14.2	297	11.1	12.6	0.33
P040	Healthy	1	43	1.028	6.5	8.8	2.1	4	1.6	0.4	0.7	7.5	56.1	31.3	7.6	4.7	0.3	4.2	2.34	0.57	0.35	0.02	125	4.19	38	90.7	29.8	329	13.6	235	10.4	12	0.24
P041	Healthy	1	59	1.016	6.5	1.6	252.2	5.6	0.3	45.4	1	4.6	64	30.7	3.3	2	0	2.94	1.41	0.15	0.09	0	109	3.61	32.6	90.3	30.2	334	13.2	141	11.4	13.1	0.16
P042	Healthy	1	58	1.016	6.5	6.4	12.9	3.5	1	2	1	5.5	65.3	27.5	5.6	1.4	0.2	3.6	1.52	0.31	0.08	0.01	116	3.9	35.1	90	29.7	330	12.5	215	10.6	12.7	1.23
P043	Healthy	1	71	1.01	6	12.7	9.1	2.2	2	2	0	4.2	59.8	30.1	7.7	2.2	0.2	2.48	1.25	0.32	0.09	0.01	116	3.73	34.9	93.6	31.1	332	13.7	242	10.3	12	0.25
P044	Healthy	1	61	1.02	6.5	14.7	1.3	2.8	2.6	0.2	0.5	4.7	44.4	50	4.3	0.9	0.4	2.07	2.33	0.2	0.04	0.02	109	3.84	34.3	89.3	28.4	318	12.9	240	11.4	13.4	0.27
P045	Healthy	0	47	1.021	7	1.6	1.5	1.9	0.3	0.3	0.3	8.2	51.9	38.3	5.7	3.6	0.5	4.27	3.16	0.47	0.3	0.04	131	4.42	39.2	88.7	29.6	334	13.7	251	10.8	12.6	0.27
P046	Healthy	1	42	1.016	7.5	4.2	2.9	24.8	1	1	4	6.9	81	14.1	3.9	0.9	0.1	5.56	0.97	0.27	0.06	0.01	68	3.14	23.5	74.8	21.7	289	17.9	277	11.5	13.5	0.32
P047	Healthy	1	63	1.031	6	350.8	10.1	6.1	63	2	1	7.8	75.2	19.7	4.1	0.9	0.1	5.87	1.54	0.32	0.07	0.01	141	4.66	43.8	94	30.3	322	14.8	353	10.1	11.5	0.36
P048	Healthy	1	34	1.018	6	9.2	2.5	2.8	1.7	0.5	0.5	4.2	45.2	39.4	12.6	2.1	0.7	1.9	1.66	0.53	0.09	0.03	103	4.04	32.9	81.4	25.5	313	15.3	266	9.3	8.4	0.25
P049	Healthy	1	60	1.013	6	6.4	3.5	6.8	1.2	0.6	1.2	7.4	65.8	27.6	5.8	0.7	0.1	4.85	2.04	0.43	0.05	0.01	110	3.71	35.3	95.1	29.6	312	14.5	374	9.8	11.1	0.37
P050	Healthy	1	60	1.021	5.5	7.9	35.3	3.9	1.4	6.4	0.7	8	73.3	19.2	6.8	0.6	0.1	5.88	1.54	0.55	0.05	0.01	136	4.56	40.7	89.3	29.8	334	12.6	162	9.9	11.3	0.16
P051	Healthy	0	64	1.029	5.5	15.3	6.8	5	2.8	1.2	0.9	6.8	67.5	18.2	8.3	5.6	0.4	4.56	1.23	0.56	0.38	0.03	141	4.18	41.4	99	33.7	341	13.3	265	10.3	11.8	0.27
P052	Healthy	1	60	1.008	5	3.9	0.7	0	0.7	0.1	0	6.7	69.6	12.3	5.5	12.6	0	4.65	0.82	0.37	0.84	0	108	3.71	33.9	91.4	29.1	319	13.4	246	11	13.4	0.27
P053	Healthy	1	50	1.015	5.5	7.7	6.4	8	1.4	1.2	1.4	6.3	66.4	21.7	9	2.7	0.2	4.2	1.37	0.57	0.17	0.01	121	4.17	38.2	91.6	27	317	12.9	442	9.9	11	0.44
P054	Healthy	1	44	1.017	6	8.5	10.6	20.6	2	2	4	3.6	49.4	38.5	9	2.8	0.3	1.76	1.37	0.32	0.1	0.01	98	3.83	30.9	80.7	25.6	317	15.3	228	9.2	9.7	0.21
P055	Healthy	1	39	1.02	6.5	6.7	24.7	30	1.2	4.4	5.4	3.8	62.4	30	6.8	0.8	0	2.39	1.15	0.26	0.03	0	82	3.48	27	77.6	23.6	304	18.6	216	11.2	12.3	0.24
P056	Healthy	1	50	1.026	5.5	5.2	2.7	8.7	0.9	0.5	1.6	4.6	62.1	29.5	6.7	1.5	0.2	2.86	1.36	0.31	0.07	0.01	130	4.56	39.7	87.1	28.5	327	13	233	9.6	10.7	0.22
P057	Healthy	1	53	1.016	5.5	3.3	2.8	1.2	0.6	0.5	0.2	6.2	55.5	27	4.4	12.8	0.3	3.41	1.66	0.27	0.79	0.02	139	4.64	40.8	87.9	20	341	14.2	221	10.8	12.9	0.24
P058	Healthy	1	49	1.007	7	8.5	35.3	13.6	1.5	6.4	2.4	4.4	63.9	25.2	8	2.7	0.2	2.81	1.11	0.35	0.12	0.01	111	3.96	34.9	88.1	28	318	15.8	394	9.6	10.6	0.38
P059	Healthy	1	54	1.008	6	5.7	37.2	9.5	1	7	2	5.1	57.1	34.2	7.1	1.6	0	2.91	1.74	0.36	0.06	0	84	2.84	25.4	93	29.6	318	14	414	9.4	9.6	0.39
P060	Healthy	1	58	1.011	5.5	1.5	6.3	4.4	0.3	1.1	0.8	5	56.5	35.7	6	1.6	0.2	2.83	1.79	0.3	0.08	0.01	110	3.6	35	97.2	30.6	314	14.9	317	10	10.7	0.32
P061	Healthy	1	69	1.013	7	11.5	61.3	55	2	11	10	7.8	75	18.1	4.8	1.7	0.4	5.64	1.41	0.37	0.13	0.03	136	4.42	40.3	91.2	30.8	337	13.9	191	10.1	10.8	0.19
P062	Healthy	0	55	1.009	6.5	9.9	0.2	0.1	1.8	0	0	6.8	70.7	17.2	5.6	6.2	0.3	4.77	1.16	0.38	0.42	0.02	121	4.05	39	96.3	29.9	310	13.4	260	10.5	11.8	0.27
P063	Healthy	1	47	1.027	5.5	15.5	54.7	11.5	2.8	9.8	2.1	3.7	74.1	16.7	7	1.9	0.3	2.76	0.62	0.26	0.07	0.01	117	4.3	35.5	82.6	27.2	330	15.5	218	9.9	11.2	0.22
P064	Healthy	1	62	1.014	6.35	3.3	3.9	5.6	0.6	0.7	1	5.2	54.2	31.4	11.9	2.1	0.4	2.81	1.63	0.62	0.11	0.02	107	3.68	34.1	92.7	29.1	314	12.2	276	11	13	0.3
P065	Healthy	1	52	1.031	6	89.3	4.6	2.8	16.1	0.8	0.5	10.4	74.2	17.6	7.9	0.1	0.2	7.74	1.84	0.82	0.01	0.02	109	4.34	35.8	82.5	25.1	304	15.7	302	9.5	10.5	0.29
P066	Healthy	1	50	1.014	5	15.2	152.8	42.3	2.7	27.5	7.6	5.1	48.8	39.6	9.6	2	0	2.49	2.02	0.49	0.1	0	102	4.06	32.1	79.3	25.2	318	15.7	275	11.6	14.9	0.32
P067	Healthy	1	54	1.029	5.5	10.6	98.1	19.3	1.9	17.7	3.5	4.4	60.4	33.3	4.7	1.4	0.2	2.68	1.48	0.21	0.06	0.01	101	3.3	31.2	94.5	30.6	324	14.6	233	11.4	13.9	0.24
P068	Healthy	1	48	1.029	6.5	6.7	3	4.9	1.2	0.5	0.9	6.7	51.2	34.1	11.4	2.7	0.6	3.45	2.3	0.77	0.18	0.04	125	4.04	36.9	91.3	30.9	339	13.2	273	9.9	10.6	0.27
P069	Healthy	1	14	1.025	7.5	7.2	16	26.6	1.3	2.9	4.8	13.3	81.4	14.2	4.1	0.2	0.1	10.87	1.89	0.54	0.02	0.01	92	3.72	30.1	80.9	24.7	306	16.3	267	9.7	10.4	0.26
P070	Healthy	0	54	1.014	7	30.7	2.2	2.9	5.5	0.4	0.5	10.1	73.5	15.7	10.4	0.3	0.1	7.39	1.58	1.05	0.03	0.01	128	4.11	39.6	96.4	31.1	323	12.7	235	9.3	9.8	0.22
P071	Healthy	1	58	1.013	7	3.4	13.6	7.2	0.6	2.4	1.3	7.3	47.7	38.3	11.3	2	0.7	3.5	2.81	0.83	0.15	0.05	104	3.78	33	87.3	27.5	315	14.6	328	10.4	11.6	0.34
P072	Healthy	1	38	1.034	6	13.9	3.4	4.6	2.5	0.6	0.8	4.8	56.9	28.7	11.5	2.5	0.4	2.72	1.37	0.55	0.12	0.02	118	3.76	35.6	94.7	31.4	331	12.8	164	11.6	13.6	0.19
P073	Healthy	1	55	1.013	6.5	3.9	4.9	71.3	0.7	0.9	12.8	4.4	55.6	33.1	9.7	1.4	0.2	2.47	1.47	0.43	0.06	0.01	102	3.26	31.1	95.4	31.3	328	12.8	199	10.1	11.1	0.2
P074	Healthy	1	53	1.018	6.5	9.5	3.7	7.6	1.7	0.7	1.4	3.6	55.8	33.5	7	3.1	0.6	2	1.2	0.25	0.11	0.02	117	3.96	37.4	94.4	29.5	313	13	170	10.6	12.4	0.18
P075	Healthy	0	45	1.024	7	7.5	1.2	0.1	1.4	0.2	0	4.6	59.3	31.7	5.6	2.8	0.6	2.75	1.47	0.26	0.13	0.03	122	3.9	37.3	95.6	31.3	327	12.7	249	9.8	11.2	0.24
P076	Healthy	1	46	1.02	6	10.6	15.4	7.3	2	3	1	7.2	60.5	31.8	6.6	1	0.1	4.38	2.3	0.48	0.07	0.01	119	3.96	36.4	91.9	30.1	327	12.9	286	10.4	11.4	0.3
P077	Healthy	1	20	1.016	5.5	25.4	33.2	84	5.6	6	15.1	6.7	62.2	29.5	6.7	1.5	0.1	4.19	1.99	0.45	0.1	0.01	122	4	37.1	92.8	30.5	329	12.6	249	10.5	12.6	0.26
P078	Healthy	1	50	1.029	5.5	9.5	68.3	32.1	1.7	12.3	5.8	10.2	78.3	13.1	6.3	2	0.3	8.02	1.34	0.65	0.2	0.03	121	4.01	36.9	92	30.2	328	14	373	10.4	11.5	0.39
P079	Healthy	1	54	1.012	5	0.5	1.4	1.4	0	0	0	5.1	54.1	36.5	7.4	1.6	0.4	2.77	1.87	0.38	0.08	0.02	128	4.01	40.1	100	31.9	319	12.6	264	10.7	12.3	0.28
P080	Healthy	1	34	1.023	6	47.4	34.6	18.6	8.5	6.2	3.3	7.8	72.5	22.7	4	0.8	0	5.66	1.77	0.31	0.06	0	118	3.93	36.2	92.1	30	326	12.8	403	10.7	12.8	0.43
P081	Healthy	1	55	1.021	5.5	11	35.3	23.2	2	6	4	6	55.2	35.4	8.3	0.8	0.3	3.33	2.14	0.5	0.05	0.02	127	4.36	40.4	92.7	29.1	314	12.1	201	10.4	11.5	0.21
P082	Healthy	1	29	1.024	7	4.1	14.5	3.6	1	3	1	6	72.2	20	7.3	0.3	0.2	4.34	1.2	0.44	0.02	0.01	114	3.85	34.2	88.8	29.6	333	14.2	199	11.5	14.4	0.23
P083	Healthy	1	34	1.026	5.5	30	3.7	3.5	5.4	0.7	0.6	5.2	44.9	41.5	11.8	1.6	0.2	2.32	2.14	0.51	0.08	0.01	111	3.91	33.5	85.7	28.4	331	14	210	11.6	13.6	0.24
P084	Healthy	1	54	1.023	6	6	1.6	0.9	1.1	0.3	0.2	4.2	67.9	31.7	8.1	2.1	0.2	2.43	1.33	0.34	0.09	0.01	135	4.11	40.1	97.6	32.8	337	12.5	238	11.1	13.3	0.26
P085	Healthy	1	19	1.031	7	6.5	1.6	11	1.2	0.3	2	8.8	43	50.3	5.7	0.7	0.3	3.79	4.44	0.5	0.06	0.03	106	3.82	33.7	88.2	27.7	315	16.9	385	10.3	10.6	0.4
P086	Healthy	1	54	1.024	5.5	110.4	14.5	6.8	19.9	2.6	1.2	7.3	72.5	22.1	4.4	1	0	5.3	1.61	0.32	0.07	0	130	4.39	40	91.1	29.6	325	12.3	268	11.7	10.2	0.27
P087	Healthy	1	47	1.021	6	15.3	13.7	27.9	2.8	2.5	5	5.8	47.3	42.9	7.7	1.9	0.2	2.75	2.49	0.45	0.11	0.01	81	3.7	27.8	75.1	21.9	291	16.8	371	10.3	12	0.38
P088	Healthy	1	44	1.012	6	1.2	2.8	3	0.2	0.5	0.5	6.5	67.8	23.7	7.5	0.8	0.2	4.44	1.55	0.49	0.05	0.01	111	4.15	34.9	84.1	26.7	318	14.7	326	9.7	11	0.32
P089	Healthy	1	48	1.011	7.5	11.2	0.2	0.9	2	0	0.2	6.3	82.4	13.2	4.1	0.3	0	5.18	0.83	0.26	0.02	0	128	4.98	38.8	77.9	25.7	330	13.4	259	10.2	11.4	0.26
P090	Healthy	1	37	1.025	5.5	10.1	81.4	29.4	1.8	14.7	5.3	5.8	56	24.1	9.7	0.2	0	3.83	1.4	0.56	0.01	0	78	3.71	26.9	72.52	21	290	17.8	406	11.8	10	0.41
P091	Healthy	1	26	1.01	6	0.7	1.4	3.5	0.1	0.3	0.6	3	57.2	29	11.2	2.3	0.3	1.73	0.88	0.34	0.07	0.01	83	3.15	26.5	84.1	26.3	313	16.5	219	9.7	9.6	0.21
P092	Healthy	1	48	1.021	6.5	15.3	6	5.4	2.8	1.1	1	3.6	60.6	26.5	10.1	2.5	0.3	2.17	0.95	0.36	0.09	0.01	85	3.53	29.4	83.3	24.1	289	16.6	583	8.4	8.6	0.49
P093	Healthy	1	48	1.032	6.5	15.3	17.2	130.1	2.8	3.1	23.4	7.3	56.7	31.7	10.2	1.1	0.3	4.15	2.32	0.75	0.08	0.02	112	4.03	34.3	85.1	27.8	327	15.9	301	8.5	8	0.26
P094	Healthy	1	40	1.012	6	0.7	2.2	2.3	0.1	0.4	0.4	5.3	75.4	12.2	8.2	3.6	0.6	3.96	0.64	0.43	0.19	0.03	118	4.44	37.1	83.6	26.6	318	12.7	214	10.6	11.6	0.23
P095	Healthy	1	21	1.017	7.5	12.1	25.3	20.4	2.2	4.6	3.7	6.7	56	32	11.3	0.5	0.2	3.74	2.13	0.75	0.03	0.01	98	3.82	31.3	81.9	25.7	313	17.1	319	10	11.4	0.32
P096	Healthy	1	45	1.032	5	705.7	4.3	5.8	127	0.8	1	8.1	55.2	36.6	5.8	2.2	0.2	4.47	2.97	0.47	0.18	0.02	151	4.94	44.6	90.3	30.6	339	12.5	360	10.9	13.3	0.37
P097	Healthy	1	19	1.016	6.5	6.5	1.5	3.6	1.2	0.3	0.6	5.5	56.3	28.9	13	1.6	0.2	3.12	1.6	0.72	0.09	0.01	90	3.94	30	76.1	22.8	300	15.4	214	10.1	10.1	0.22
P098	Healthy	1	37	1.03	5.5	9.8	3.7	4.2	1.8	0.7	0.8	4.3	55.9	29.5	12.5	1.4	0.7	2.41	1.27	0.54	0.06	0.03	126	3.93	37.8	96.2	32.1	333	11.6	157	12	15.7	0.19
P099	Healthy	0	48	1.021	7.5	5.6	0.7	0.8	1	0.1	0.1	7.3	77.1	14.8	6.5	1.5	0.1	5.61	1.08	0.47	0.11	0.01	139	4.62	40.8	88.3	30.1	341	12.5	173	11.3	12.7	0.2
P100	Healthy	1	31	1.015	6.5	1.9	6.3	2.8	0.3	1.1	0.5	11.5	49.6	42.8	7	0.3	0.3	5.71	4.92	0.81	0.03	0.03	63	3.52	22.5	63.9	17.9	280	18.5	540	8.8	8.6	0.48
P101	Healthy	1	25	1.023	6	6.7	20.3	55.1	1	4	10	5	72.5	19.2	1.6	6.7	0	3.65	0.97	0.08	0.34	0	107	3.62	32.1	88.7	29.6	333	12	204	9.5	10.4	0.19
P102	Healthy	1	54	1.028	6	5.3	55.8	34.8	1	10	6.3	4.4	48.4	41.5	6.5	2.9	0.7	2.14	1.84	0.29	0.13	0.03	131	4.14	39.6	95.7	31.6	331	13.2	219	10.6	11.8	0.23
P103	Healthy	1	44	1.016	5.5	32.2	20.2	16.8	5.8	3.6	3	6.6	55.4	36.6	6.4	1.4	0.2	3.67	2.42	0.42	0.09	0.01	121	3.99	37.5	94	30.3	323	12	285	9.8	10.7	0.28
P104	Healthy	1	25	1.026	6.5	1109.4	21.3	12.6	199.7	3.8	2.3	7.7	57.5	33.3	6.4	2.5	0.3	4.44	2.57	0.49	0.19	0.02	114	4.44	34.3	77.3	25.7	332	12.9	278	10.3	11.5	0.29
P105	Healthy	1	32	1.029	5.5	29.6	5.3	3.9	5.3	1	0.7	7.2	62.4	26	8.2	3.1	0.3	4.5	1.87	0.59	0.22	0.02	126	4.28	38.7	90.4	29.4	326	13	273	10	11.2	0.27
P106	Healthy	1	43	1.033	6	11.5	3	15	2.1	0.5	2.7	8	65.7	21.7	9.9	2.6	0.1	5.24	1.73	0.79	0.21	0.01	124	4.42	37.9	85.7	28.1	327	12.6	365	10.5	12.4	0.38
P107	Healthy	1	20	1.008	7	5.8	6.8	16.5	1	1.2	3	14	83.1	9.4	6.4	1	0.1	11.62	1.32	0.89	0.14	0.01	103	4.3	33.2	77.2	24	310	16	321	10.7	12.3	0.34
P108	Healthy	1	36	1.019	7	15.3	14.3	39.8	2.8	2.6	7.2	8.2	59.7	31.8	4.5	3.6	0.4	4.91	2.61	0.37	0.3	0.03	128	4.22	37.8	89.6	30.3	339	12.6	340	9.8	11.4	0.33
P109	Healthy	1	30	1.012	7	2.2	1.6	2.8	0	0	1	9.5	61.3	29.1	8.9	0.4	0.3	5.83	2.77	0.85	0.04	0.03	106	4.54	34.5	76	23.3	307	17.5	332	11.3	13.3	0.38
P110	Healthy	1	48	1.012	6	8.8	1.5	2.3	1.6	0.3	0.4	5.7	70	28.5	0.2	1.1	0.2	4.67	1.9	0.01	0.07	0.01	110	3.99	34.3	86	27.6	321	18.5	267	10.8	12.8	0.29
P111	Healthy	1	24	1.024	5.5	15.3	15.4	39.3	2.8	2.8	7.1	4.9	52.2	37.8	7.8	2	0.2	2.55	1.85	0.38	0.1	0.01	112	3.74	34	90.9	29.9	329	12.6	197	10.6	12.2	0.21
P112	Healthy	1	16	1.029	6	4.9	7.2	6.5	0.9	1.3	1.2	4.1	45.4	46.2	5.7	2.7	0	1.85	1.88	0.23	0.11	0	96	3.66	30.6	83.62	26.2	314	12.1	265	12.2	10.4	0.28
P113	Healthy	1	44	1.027	6	1.4	1.2	5.1	0.3	0.2	0.9	5	61.3	28.5	8	1.8	0.4	3.05	1.42	0.4	0.09	0.02	115	3.97	34.7	87.4	29	331	12.8	225	10.7	12.4	0.24
P114	Healthy	1	57	1.016	6.5	1.8	38.8	5	0.3	7	0.9	3.6	41.2	50.3	5.2	1.9	1.4	1.49	1.82	0.19	0.07	0.05	132	4.3	39	90.7	30.7	338	14	277	11	13	0.3
P115	Healthy	1	42	1.014	6.5	2.8	5.7	6.7	0.5	1	1.2	8.7	64.4	26.1	7.4	1.8	0.3	5.6	2.27	0.64	0.16	0.03	108	3.64	33	90.7	29.7	327	13.2	331	9.9	10.5	0.33
P116	Healthy	1	49	1.028	6	99.3	27.5	16.5	17.9	5	3	3.3	55.2	35.9	5.8	2.5	0.6	1.8	1.17	0.19	0.08	0.02	54	3.53	20.9	59.2	15.3	258	21.4	345	9.3	11.4	0.32
P117	Healthy	0	56	1.027	5.5	1.2	3.3	1.6	0	1	0	9	75.7	17.1	6.7	0.4	0.1	6.82	1.54	0.6	0.04	0.01	130	4.56	40.3	88.4	28.5	323	13.8	287	10	11.3	0.29
P118	Healthy	1	55	1.013	5	6.1	35.3	14	1.1	6.4	2.5	6.5	66.4	20	9.6	3.4	0.6	4.29	1.29	0.62	0.22	0.04	80	3.36	26.2	78	23.8	305	17.8	477	8.7	8.4	0.41
P119	Healthy	1	12	1.028	6.5	15.3	260	26	2.8	46.8	4.7	5.4	50.4	37.7	10.4	1.3	0.2	2.7	2.02	0.56	0.07	0.01	109	3.96	33.6	84.8	27.5	324	14.2	268	11.4	13.6	0.3
P120	Healthy	1	50	1.024	6	3.6	7.6	5.3	0.6	1.4	1	8.4	73.6	20.2	6.2	0	0	6.18	1.7	0.52	0	0	96	3.56	30.4	85.4	27	316	17.9	429	10.3	11.5	0.44
P121	Healthy	1	55	1.016	7	9.1	7.5	7.6	1.6	1.4	1.4	6.8	74.8	18.8	6.1	0.3	0	5.05	1.27	0.41	0.02	0	75	3.02	26.2	86.8	24.8	286	15.9	470	8.3	8	0.39
P122	Healthy	1	40	1.02	6.5	15.3	11.3	7.6	2.8	2	1.4	6.3	67.4	24.6	6.4	1.4	0.2	4.24	1.55	0.4	0.09	0.01	104	3.6	32.7	90.8	28.9	318	14	244	10.3	11.3	0.25
P123	Healthy	1	38	1.009	6	6.4	7.2	36.6	1.2	1.3	6.6	4.3	48.4	44.2	5.6	1.6	0.2	2.08	1.9	0.24	0.07	0.01	118	4.03	36.1	89.6	29.3	327	13.5	175	11.6	14.2	0.2
P124	Healthy	1	55	1.022	6	7.5	35	14.9	1.4	6.3	2.7	5.6	60	31.6	5.7	2.2	0.5	3.34	1.76	0.32	0.12	0.03	121	3.94	36.2	91.9	30.7	334	12.3	369	10.8	13	0.4
P125	Healthy	1	16	1.036	6	6.1	3	1.1	1.1	0.5	0.2	5.1	62.2	29.3	7.5	0.6	0.4	3.14	1.48	0.38	0.03	0.02	70	3.94	25.3	64.2	17.8	277	19.4	541	9.5	11.7	0.51
P126	Healthy	1	52	1.012	7	11.2	142.6	26.8	2	25.7	4.8	3.6	39.2	51	6.7	2.5	0.6	1.4	1.82	0.24	0.09	0.02	108	3.21	32.2	100.3	33.6	335	19.2	140	9.4	10.4	0.13
P127	Healthy	0	42	1.027	6	5.1	1.4	1.9	0.9	0.3	0.3	4.9	72.6	13.7	10	3.5	0.2	3.54	0.67	0.49	0.17	0.01	131	4.26	40.5	95.1	30.8	323	14	253	10.1	12.1	0.26
P128	Healthy	1	54	1.02	6	7.3	35.3	4.7	1.3	6.4	0.8	6	58.9	29.8	9.5	1.5	0.3	3.52	1.78	0.57	0.09	0.02	123	4.02	37	92	30.6	332	12.6	341	10	11.4	0.34
P129	Healthy	1	35	1.029	5.5	2.7	13.4	12.8	0.5	2.4	2.3	5.6	65.6	27.3	5.6	1.1	0.4	3.66	1.52	0.31	0.06	0.02	72	3.96	27	68.2	18.2	267	18.8	381	10.8	12.9	0.41
P130	Healthy	1	24	1.013	6.5	5.6	22.1	16.2	1	4	2.9	17.9	87	7.4	5.2	0.3	0.1	15.59	1.33	0.93	0.06	0.02	87	3.44	27.8	80.8	26.3	313	15.9	308	9.5	9.8	0.29
P131	Healthy	1	47	1.012	5	2.4	35.3	1.5	0.4	0.4	0.3	3.9	59	33.2	6.2	1.3	0.3	2.28	1.28	0.24	0.05	0.01	129	4.11	40	97.3	31.4	323	13.4	206	10.7	12.3	0.22
P132	Healthy	1	35	1.016	6	0.9	1.5	1.7	0.2	0.3	0.3	7.3	53.4	37.7	8	1.8	0.1	3.84	2.77	0.59	0.13	0.01	109	3.97	34.9	87.9	27.5	312	14.6	345	11.4	13.9	0.39
P133	Healthy	1	54	1.027	5.5	2.5	23.4	29	0.5	4.2	5.2	5	73.1	17.9	6	2.8	0.2	3.64	0.89	0.3	0.14	0.01	140	4.49	41.5	92.4	31.2	337	14.6	166	11.9	15.7	0.2
P134	Healthy	1	37	1.028	6	3.2	7.7	3.6	0.6	1.4	0.6	12.7	80.8	11	7.6	0.5	0.1	10.25	1.4	0.97	0.06	0.01	118	3.87	35.3	91.2	30.5	334	12	285	9.9	10.7	0.28
P135	Healthy	0	50	1.013	5.5	2.6	2.5	0.9	0	0	0	7.8	65	21.3	11	1.3	0.4	5.12	1.65	0.85	0.1	0.03	139	4.57	41.7	91.2	30.4	333	12.9	452	9.1	9.6	0.41
P136	Healthy	1	43	1.012	5.5	6.5	28.3	3.2	1.2	5.1	0.6	5	53	33.9	8.5	4.2	0.4	2.63	1.68	0.42	0.21	0.02	107	3.63	33.3	91.7	29.5	321	14	188	11.1	13	0.21
P137	Healthy	1	20	1.023	6	47.8	6.8	13.6	9	1	2	6.8	71.5	21	6.2	1.2	0.1	4.86	1.43	0.42	0.08	0.01	118	3.78	35.7	94.4	31.2	331	12.8	229	9.1	9.6	0.21
P138	Healthy	1	20	1.021	7	56.9	202.7	32.2	10.2	36.5	5.8	6.5	60.9	33.3	4.7	0.9	0.2	3.98	2.18	0.31	0.06	0.01	127	4.44	39.2	88.3	28.6	324	12.1	261	10.7	12.2	0.28
P139	Healthy	1	48	1.017	5.5	8.2	60.9	35.6	1.5	11	6.4	10.1	65.3	22.9	10.5	1	0.3	6.61	2.32	1.06	0.1	0.03	108	4.08	33.9	83.1	26.5	319	12.8	588	9.1	9.5	0.53
P140	Healthy	1	54	1.027	5	28.8	2567	46.1	5.2	463.7	8.3	7.1	78.9	11.5	8.7	0.6	0.3	5.62	0.82	0.62	0.04	0.02	110	3.79	34.1	90	29	323	14.4	254	11.2	13.1	0.28
P141	Healthy	1	55	1.012	6	8.7	28.6	31.3	1.6	5.1	5.6	3.5	60.9	26.6	11	1.2	0.3	2.2	0.9	0.4	0	0	107	3.38	32.8	97.3	31.6	325	14.8	61	9.8	16.9	0.053
P142	Healthy	0	64	1.027	6	65.8	3.6	1.1	11.8	0.6	0.2	9.8	61.7	22.5	9	6.5	0.3	6	2.2	0.9	0.6	0	138	4.68	41.7	89	29.5	331	12.9	263	6.9	16.7	0.18
P143	Healthy	0	37	1.027	6	2.7	73.8	4	0.5	13.3	0.7	11.1	65.9	23.5	4.6	5.8	0.2	7.3	2.6	0.5	0.6	0	152	4.88	46.5	95.3	31.1	326	14.6	195	8.9	16.7	0.173
P144	Healthy	1	21	1.018	5.5	549.8	18.9	32	99	3	6	9	56.7	31.6	8.7	1	2	5.09	2.84	0.78	0.09	0.18	145	4.7	43.7	92.9	30.8	332	10	342	7	10	0.241
P145	Healthy	1	25	1.015	5.5	2.3	2.5	5	0	0	1	6.7	44.8	36.8	15.8	1.5	1.1	3.02	2.48	1.06	0.1	0.07	133	4.81	41.3	87.4	28.1	321	11.8	222	8.1	12.8	0.179
P146	Healthy	1	30	1.023	6.5	13	6.5	31.2	2.3	1.2	5.6	6.1	60.8	29.8	6.6	1.9	0.9	3.7	1.8	0.4	0.1	0.1	121	4.13	38	92	29.3	319	13.7	208	8.2	17.2	0.169
P147	Healthy	0	14	1.029	5.5	40	2.5	0.4	7.2	0.5	0.1	7.1	50.2	43.2	5.7	0.4	0.5	3.6	3.1	0.4	0	0	127	4.45	40.1	90.1	28.6	317	16.1	353	7.3	16.4	0.258
P148	Healthy	1	38	1.024	6	2.6	8.2	7.8	0.5	1.5	1.4	6.3	71	21	6.8	0.7	0.5	4.5	1.3	0.4	0	0	107	4.46	33.7	75.4	24	318	17.3	181	10.5	16.8	0.19
P149	Healthy	1	36	1.013	5.5	4.1	3.4	5.5	0.7	0.6	1	6.8	72.4	20	5.8	0.8	1	4.9	1.3	0.4	0.1	0.1	104	4.53	33.7	74.5	23.1	310	32.7	396	8.8	17.6	0.346
P150	Healthy	0	26	1.032	5.5	15.3	25.3	4.6	2.8	4.6	0.8	8	66.3	23.3	7.2	2.8	0.4	5.3	1.9	0.6	0.2	0	122	4.22	37.6	89.1	29	325	13.4	284	6.9	16.8	0.197
P151	Healthy	1	45	1.017	5	2.2	7.4	1.2	0.4	1.3	0.2	6.3	61.8	28.3	7.3	2	0.6	3.9	1.8	0.5	0.1	0	125	4.27	38.4	90	29.3	326	12.7	425	6.9	16.4	0.291
P152	Healthy	1	28	1.019	6	5.7	28.3	113.7	1	5.1	20.5	3.5	51.4	36.6	9.6	2.2	0.2	1.8	1.3	0.3	0.1	0	96	4.07	30.8	75.6	23.6	313	17.3	195	10.5	18.6	0.204
P153	Healthy	1	44	1.016	5.5	3.7	7.5	35.5	0.7	1.4	6.4	4.4	64.7	28.7	6.6	0	0	2.8	1.3	0.3	0	0	100	4.59	33	72	21.8	303	17.6	183	7	17.4	0.127
P154	Healthy	1	52	1.019	6.5	27.4	5.1	7.8	4.9	0.9	1.4	7.2	72.2	19.7	6.6	1.1	0.5	5.2	1.4	0.5	0.1	0	136	4.07	11.5	89	29.1	328	12.2	175	8.5	16.2	0.148
P155	Healthy	1	59	1.021	6	4	39.5	13	1	7	2	3.6	52.8	41.6	3.9	1.1	0.6	1.92	1.51	0.14	0.04	0.02	141	4.56	41.7	91.6	31	338	14.1	225	11.1	13.2	0.25
P156	Healthy	1	63	1.013	6	3.9	88	5.8	0.7	15.8	1.9	7.6	55.6	34.2	6.2	3.7	0.3	4.25	2.61	0.47	0.28	0.02	99	3.71	31.2	64.1	26.7	317	16.2	256	9.9	11.2	0.25
P157	Healthy	1	58	1.014	7	5.2	24.2	2.1	1	4	0	10.9	71.1	21.8	6.5	0.5	0.1	7.71	2.37	0.71	0.05	0.01	111	3.42	33.7	98.6	32.5	329	13	319	10.5	13.2	0.3
P158	Healthy	1	45	1.009	6.5	3.3	4.7	6.7	0.6	0.8	1.2	8.6	70.6	19.8	8.8	0.8	0	6.04	1.69	0.75	0.07	0	108	3.97	34.1	85.9	27.2	317	17.7	431	9.2	9.7	0.4
P159	Healthy	1	32	1.023	6	3	2	2.3	0.5	0.4	0.4	4.9	61.9	29.2	6.8	1.9	0.2	3.01	1.42	0.33	0.09	0.01	74	4.14	27.2	65.7	17.9	272	18.8	284	8.6	8.5	0.24
P160	Healthy	1	56	1.014	6	1.3	4.5	0.9	0	1	0	6	61.2	32.2	5.6	0.8	0.2	3.69	1.94	0.34	0.05	0.01	133	4.51	41.2	91.4	29.5	323	13	213	11	13	0.24
P161	Healthy	1	42	1.011	6	9.1	23.3	19.3	2	4	3	6.9	70.3	16.1	8	5.5	0.1	4.85	1.11	0.55	0.38	0.01	111	3.68	34.5	93.8	30.2	322	15.2	292	9.3	10	0.27
P162	Healthy	1	44	1.036	5.5	15.1	96.3	146.2	2.7	17.3	26.3	7.1	64	29.3	5.7	1	0	4.53	2.07	0.4	0.07	0	119	3.79	36.2	95.5	31.4	329	13.5	252	9.5	10.2	0.24
P163	Healthy	1	43	1.012	7	1.4	0.7	1.5	0	0	0	5.8	71.2	21.5	6.6	0.7	0	4.11	1.24	0.38	0.04	0	106	3.62	32	88.4	29.3	331	13	305	9.6	10.4	0.29
P164	Healthy	1	59	1.015	5.5	11.7	2.1	3.6	2	0	1	4.2	50.8	39.2	6.2	3.8	0	2.14	1.65	0.26	0.16	0	146	4.8	42.2	87.9	30.4	346	12.1	177	11.7	13.4	0.21
P165	Healthy	1	50	1.009	7	6.3	2.2	3.7	1.1	0.4	0.7	5.3	59.6	32.9	4.5	3	0	3.17	1.75	0.24	0.16	0	133	3.8	39.8	104.7	35	334	12.9	257	10.4	11.6	0.27
P166	Healthy	1	53	1.013	6	4.4	1.6	1.4	0.8	0.3	0.3	6.3	60.8	33.2	4.1	1.4	0.5	3.84	2.1	0.26	0.09	0.03	132	4.27	39.4	92.3	30.9	335	12.9	236	11.3	13.2	0.27
P167	Healthy	1	41	1.02	7	3.6	35.3	7.4	1	6	1	6.3	70	20.8	3	6	0.2	3.71	1.1	0.16	0.32	0.01	60	3.63	23.1	63.6	16.5	260	20.9	216	10	12.2	0.3
P168	Healthy	1	33	1.012	6.5	20.7	9.2	12	4	2	2	3.3	40.8	46.3	8.3	3.7	0.9	1.33	1.51	0.27	0.12	0.03	76	3.68	25.2	68.5	20.7	302	18.1	142	10	12.2	0.3
P169	Healthy	1	26	1.037	7	6.7	97.5	14.5	1	18	3	7.5	60.7	27.6	9.6	2	0.1	4.55	2.07	0.72	0.15	0.01	105	4.31	33.7	78.2	24.4	312	16.4	199	10	12.2	0.3
P170	ILD	1	66	1.014	6.5	5.7	2.7	1.6	1	0	0	5.3	52	30.3	5.8	11.2	0.7	2.75	1.6	0.31	0.59	0.04	123	4.04	37.1	91.9	30.3	330	10	266	6.9	10	0.184
P171	ILD	1	55	1.01	5.5	7.4	13.9	1.5	1	3	0	3.4	57.9	32.7	6.2	2.6	0.6	1.99	1.12	0.21	0.09	0.02	139	4.85	43.1	88.7	28.7	323	10	200	7.9	13.5	0.159
P172	ILD	1	65	1.011	6	2.1	4.3	2.5	0	1	0	7.6	55.9	34.2	6.5	2.6	0.8	4.26	2.61	0.5	0.2	0.06	136	4.53	40.3	89	29.9	336	10.1	261	7.9	13.5	0.207
P173	ILD	1	56	1.01	6	4.2	32.4	2.6	1	6	0	5.4	60.2	25.7	6.2	7.1	0.8	3.25	1.39	0.33	0.38	0.04	133	4.41	41.2	93.4	30.2	323	10.2	263	8.3	14.5	0.219
P174	ILD	1	56	1.01	6	19.3	1021.2	15.8	3	184	3	10.9	68.7	22.3	6.7	1.4	0.9	7.49	2.43	0.73	0.15	0.1	104	3.87	33.2	85.9	27	314	10.3	267	7.8	11.8	0.208
P175	ILD	0	55	1.018	6	8.7	16.8	11.6	2	3	2	8.4	67.7	21.6	8.3	1.4	1	5.65	1.8	0.69	0.12	0.08	136	4.42	41.7	94.2	30.7	326	10.4	256	7.9	13.3	0.203
P176	ILD	1	76	1.02	5	7.7	8.8	6.8	1	2	1	7.4	73.5	17.3	7.4	1.1	0.7	5.43	1.28	0.55	0.08	0.05	97	3.44	30.3	88.1	28.2	320	10.4	276	7	10.8	0.194
P177	ILD	1	62	1.013	5.5	7.1	1.6	0.8	1	0	0	6.2	54.3	37.9	6.2	0.9	0.7	3.34	2.33	0.38	0.06	0.04	117	4.19	36.2	86.5	27.9	323	10.4	253	8.3	13.8	0.21
P178	ILD	1	53	1.015	6	266.8	2056.2	23.1	48	370	4	10	72	17.2	8.8	1.3	0.7	7.19	1.72	0.88	0.13	0.07	90	3.2	28	87.5	28.1	321	10.4	519	7.7	11.8	0.398
P179	ILD	1	54	1.01	6.5	50.3	36.9	5.6	9	7	1	6.6	58.7	29.6	8	2.8	0.9	3.86	1.95	0.53	0.18	0.06	121	4.46	38.4	86.1	27	314	10.4	463	7.2	10.5	0.332
P180	ILD	1	81	1.011	7.5	11.2	3.1	7.5	2	1	1	7.5	69.7	20.6	8	1	0.7	5.2	1.54	0.6	0.07	0.05	105	3.6	32	89	29.2	328	10.5	234	8.2	14.3	0.192
P181	ILD	0	66	1.01	7.5	2.8	4.1	1	1	1	0	11.9	77.6	9.7	9.8	2.1	0.8	9.23	1.15	1.17	0.25	0.1	116	3.66	36.3	99.1	31.6	319	10.5	353	6.8	9.8	0.24
P182	ILD	1	73	1.011	7	6.5	4.9	1.6	1	1	0	7.7	54.8	34.1	8.6	1.6	0.9	4.21	2.62	0.66	0.12	0.07	119	4.18	37.3	89.2	28.3	318	10.6	265	7.4	12	0.197
P183	ILD	0	57	1.027	6	6.7	10	4.1	1	2	1	10.9	54.4	34	7.9	2.2	1.5	5.94	3.72	0.86	0.24	0.16	147	4.33	45.2	104.4	34	326	10.6	138	8.8	14.8	0.122
P184	ILD	1	56	1.013	6.5	4.4	6.8	1.8	1	1	0	4.7	49.3	40.3	8.1	1.7	0.6	2.33	1.99	0.38	0.08	0.03	120	4.1	38.1	92.8	29.3	29.3	10.6	265	7.9	13	0.21
P185	ILD	1	71	1.008	7	5.1	0.7	0.5	1	0	0	3.9	62	23.4	11	2.8	0.8	2.39	0.9	0.42	0.11	0.03	119	3.95	35.6	90.2	30.1	334	10.7	169	7.2	11.3	0.121
P186	ILD	1	65	1.025	5.5	28.2	57	23.5	5	10	4	6.1	52.4	36.8	8.3	1.9	0.6	3.2	2.25	0.51	0.12	0.04	109	3.66	33.1	90.3	29.8	331	10.8	255	8.3	13.3	0.212
P187	ILD	0	65	1.012	7	2.6	4.1	1.6	0	1	0	7.6	67	18.7	10.8	2.1	1.4	5.12	1.43	0.83	0.16	0.11	116	3.93	35.6	90.7	29.5	325	10.9	239	7.8	13.3	0.187
P188	ILD	1	61	1.013	7.5	5.3	60.9	12.4	1	11	2	6.1	71	17.9	8.5	2.1	0.5	4.33	1.09	0.52	0.13	0.03	103	3.5	31.8	90.8	29.5	325	11	220	7.6	11.5	0.166
P189	ILD	1	64	1.022	5.5	5.3	79	82.5	1	14	15	12.1	60.2	27.7	6.6	3.7	1.8	7.3	3.36	0.8	0.45	0.22	137	5.04	43.5	86.3	27.2	315	11.1	266	8.7	15.8	0.231
P190	ILD	0	51	1.012	7.5	6.3	2.3	0.9	1	0	0	10.7	61.8	28.2	7.2	1.5	1.3	6.63	3.03	0.77	0.16	0.14	115	3.96	35.4	89.4	28.9	324	11.1	503	6.9	10	0.348
P191	ILD	1	57	1.016	7.5	9.5	3.9	11	2	1	2	10.6	70.5	18.7	9	0.9	0.9	7.5	1.99	0.96	0.1	0.1	94	3.4	30	88.4	27.7	313	11.1	641	6.7	9.5	0.426
P192	ILD	1	60	1.008	5.5	4.3	12.4	2.2	1	2	0	5.2	55.2	33.7	8	2.5	0.6	2.87	1.75	0.42	0.13	0.03	93	3.28	28.5	87	28.2	324	11.2	437	7.3	10.8	0.319
P193	ILD	1	51	1.024	7	7.3	46.4	2.4	1	8	0	8.7	47.6	43.2	7.1	1.1	1	4.16	3.77	0.62	0.1	0.09	113	4.17	34.9	83.6	27.1	324	11.2	313	8.5	14.8	0.264
P194	ILD	1	52	1.015	5.5	1.9	6	4.6	0	1	1	5.9	64.2	23.3	6.6	4.1	1.8	3.8	1.38	0.39	0.24	0.11	141	5.05	43.1	85.4	28	328	11.3	213	7.2	10.8	0.153
P195	ILD	1	64	1.012	6	7.8	6.8	4.7	1	1	1	11.1	80.9	11.9	4.6	1.4	1.2	8.97	1.32	0.51	0.16	0.13	113	3.77	34.5	91.7	30.3	331	11.5	314	6.7	10.3	0.209
P196	ILD	1	56	1.006	6.5	0.4	0.2	0.8	0	0	0	4.4	66	20.3	9.2	4	0.5	2.92	0.9	0.4	0.18	0.02	111	4.08	35.3	86.4	27.1	314	11.5	343	7.7	11.8	0.263
P197	ILD	1	57	1.016	5.5	11.2	80.1	58.3	2	14	10	4.5	70.8	14.8	10.6	3.1	0.7	3.18	0.66	0.48	0.14	0.03	73	2.78	23.3	83.9	26.3	314	11.5	310	7.7	12	0.238
P198	ILD	1	62	1.01	7.5	1	3.6	2.7	0	1	0	8.8	55.6	34.7	6.7	1.8	1.2	4.87	3.04	0.59	0.16	0.11	105	3.81	32.3	84.7	27.5	325	11.7	379	6.5	9.5	0.247
P199	ILD	1	55	1.009	5.5	1	7.6	1.9	0	1	0	7.3	75.7	16	5.6	2.1	0.6	5.53	1.17	0.41	0.15	0.04	116	4.14	36.2	87.3	28	321	11.7	203	7.7	12.5	0.156
P200	ILD	1	62	1.013	5	24.9	1371.5	20.8	4	247	4	5.8	52.6	37.6	8.3	0.6	0.9	3.03	2.16	0.48	0.03	0.05	111	4.08	34.5	84.6	27.1	320	11.8	389	7.3	10.8	0.284
P201	ILD	1	52	1.022	6.5	28.6	2.8	2.7	5	1	0	6.2	49.1	35.8	11	3.1	1	3.03	2.21	0.68	0.19	0.06	118	4.08	36.6	89.8	28.8	321	11.8	321	7.6	11.3	0.243
P202	ILD	1	72	1.021	6	8.1	56.2	100.5	1	10	18	7.3	58.6	28.5	10.1	2	0.8	4.27	2.07	0.74	0.15	0.06	119	4.33	37.5	86.5	27.5	318	11.8	189	8.8	15	0.167
P203	ILD	1	69	1.007	7	3.7	0.5	3.3	1	0	1	6	70.4	19.7	7.4	2	0.5	4.19	1.17	0.44	0.12	0.03	87	3.56	27.2	76.3	24.3	319	12	367	8.1	12.8	0.296
P204	ILD	1	56	1.017	5.5	3.5	5	0.5	1	1	0	6.4	52	34.5	9.9	2.8	0.8	3.3	2.19	0.63	0.18	0.05	110	3.76	33.6	89.4	29.3	327	12.1	188	9.2	17.8	0.173
P205	ILD	1	63	1.015	7	4.3	8.4	11.4	1	2	2	5.3	53.6	38.8	7	0.4	0.2	2.83	2.05	0.37	0.02	0.01	126	4.01	36.7	91.5	31.4	343	12.1	181	10.9	12.7	0.2
P206	ILD	1	46	1.017	5.5	2.7	3.1	1.3	0	1	0	7.4	74.8	15.1	7.7	2.3	0.1	5.56	1.12	0.57	0.17	0.01	108	3.72	32	86	29	338	12.2	320	9.6	10.5	0.31
P207	ILD	1	65	1.019	7	9.3	5.3	11	2	1	2	2.6	44.7	53.4	1.5	0	0.4	1.18	1.41	0.04	0	0.01	128	4.18	38.3	91.6	30.6	334	12.3	210	10.5	11.9	0.22
P208	ILD	1	64	1.014	6	11.2	176.6	2	2	32	0	9.4	73.3	16.9	7.6	1.4	0.8	6.86	1.58	0.71	0.13	0.07	115	3.99	35.5	89.1	28.8	323	12.5	339	7.9	12.5	0.269
P209	ILD	1	60	1.012	5	2.5	35.4	6.8	0	6	1	5.6	56.7	34.2	4.3	4.6	0.2	3.19	1.92	0.24	0.26	0.01	125	4.13	37.3	90.3	30.3	335	12.5	279	10.3	12.1	0.33
P210	ILD	1	68	1.014	6.5	6.9	32	16.4	1	6	3	4.9	72.8	18.8	7.6	0.6	0.2	3.56	0.92	0.37	0.03	0.01	94	3.25	38.5	87.7	28.9	330	12.6	421	8.4	8	0.35
P211	ILD	1	44	1.011	7.5	4.7	2.1	2.9	1	0	1	12.4	82.8	12.4	4.5	0.1	0.2	10.3	1.54	0.56	0.01	0.02	139	4.45	42.8	96.2	31.2	325	12.6	415	10.6	12.5	0.44
P212	ILD	0	52	1.015	6.5	7.5	13	10.6	1	2	2	6	54.6	35.1	6.6	3.4	0.3	3.25	2.09	0.39	0.2	0.02	157	4.98	45.3	91	31.5	347	12.6	166	10.2	11.1	0.17
P213	ILD	1	50	1.019	6	8	13.4	15.2	1	2	3	6.9	65.9	27.4	4.8	1.6	0.3	4.57	1.9	0.33	0.11	0.02	128	4.26	38.4	90.1	30	333	12.7	210	12	16.5	0.25
P214	ILD	1	55	1.017	5.5	6.1	9.8	4.3	1	2	1	5.9	68.5	25.8	3.5	2	0.2	4.05	1.53	0.21	0.12	0.01	139	5.09	44	86.4	27.3	316	12.7	367	9.8	10.8	0.36
P215	ILD	1	42	1.015	7	6.9	1.3	23.9	1	0	4	5	52.1	34.5	10.2	3	0.2	2.61	1.73	0.51	0.15	0.01	130	4.07	39.3	96.6	31.9	331	12.7	246	11	12.2	0.27
P216	ILD	1	55	1.021	6.5	3.4	6	13.5	1	1	2	4.2	53.2	32.5	5	9.3	0	2.24	1.37	0.21	0.39	0	105	3.49	31.9	91.4	30.1	329	12.7	198	10.5	12.6	0.21
P217	ILD	1	61	1.019	6	8.4	34.3	14.6	2	6	3	7.1	62.8	32.7	3.6	0.8	0.1	4.47	2.33	0.26	0.06	0.01	113	3.73	33.4	89.5	30.3	338	12.8	257	11.3	13.8	0.29
P218	ILD	1	56	1.013	7	2.9	9.8	10.1	1	2	2	8.9	76	16.9	5.8	1.1	0.2	6.75	1.5	0.52	0.1	0.02	107	3.68	32	87	29.1	334	12.9	296	8.8	9.3	0.26
P219	ILD	1	63	1.006	6	2.5	6.5	1.5	0	1	0	7.9	61.8	22.9	9.9	5.1	0.3	4.88	1.81	0.78	0.4	0.02	115	3.82	35.5	92.9	30.1	324	12.9	383	9.6	10.4	0.37
P220	ILD	1	71	1.012	6.5	4.7	14.2	3.2	1	3	1	11.4	84	8.1	5.1	2.7	0.1	9.6	0.93	0.58	0.31	0.01	106	3.54	32.5	91.8	29.9	326	12.9	323	10.5	12	0.34
P221	ILD	1	54	1.008	7	9.3	127.4	34.2	2	23	6	7.3	55.9	32.6	9.5	1.9	0.1	4.05	2.36	0.69	0.14	0.01	111	3.52	34.3	97.4	31.5	324	12.9	240	10	10.6	0.24
P222	ILD	1	38	1.015	6.5	4.7	6.5	23.4	1	1	4	5.1	55.3	34.8	6.5	3.2	0.2	2.8	1.76	0.33	0.16	0.01	124	4.1	37.1	90.5	30.2	334	13	244	11.4	13.9	0.28
P223	ILD	1	68	1.015	5.5	11.5	222.4	5.2	2	40	1	6.6	67.5	23.7	5.6	2.7	0.5	4.42	1.55	0.37	0.18	0.03	111	3.81	33.7	88.5	29.1	329	13.1	270	10.8	12.8	0.29
P224	ILD	1	68	1.012	7.5	12.7	15	7.8	2	3	1	6.5	74.8	19.6	4.8	0.8	0	4.88	1.28	0.31	0.05	0	118	3.93	35.6	90.6	30	331	13.1	337	9.8	10.5	0.33
P225	ILD	1	53	1.02	6	9.5	8	1.5	2	1	0	5.4	64.4	26.6	5.6	3.4	0	3.46	1.43	0.3	0.18	0	110	3.57	33.1	92.7	30.8	332	13.1	181	10.3	11.8	0.19
P226	ILD	1	64	1.014	7.5	62.9	5.1	9.6	11	1	2	6.8	66.7	25	7.2	1	0.1	4.5	1.69	0.49	0.07	0.01	106	3.61	33.2	92	29.4	319	13.1	356	9.7	10.5	0.35
P227	ILD	1	40	1.013	5.5	14.7	141.5	7.7	3	25	1	3.5	59.9	26.2	9	4.1	0.8	2.09	0.91	0.31	0.14	0.03	107	4.28	33.4	78.1	25	320	13.2	197	7.9	12.8	0.156
P228	ILD	1	65	1.009	6.5	5.4	2.3	2.7	1	0	0	9.9	79.1	12	6.6	2.2	0.1	7.85	1.19	0.65	0.22	0.01	113	3.88	35.1	90.5	29.1	322	13.2	345	10.4	12.1	0.36
P229	ILD	1	74	1.018	5.5	62.5	5.1	9.7	11	1	2	8.8	61.5	27.6	5.4	5.4	0.1	5.4	2.42	0.47	0.47	0.01	115	4.05	36	88.9	28.4	319	13.2	265	10.5	11.7	0.28
P230	ILD	1	69	1.014	6	8.7	36.1	5.4	2	6	1	4.8	45.2	43.3	4	7.1	0.4	2.15	2.06	0.19	0.34	0.02	112	3.75	34.7	92.5	29.9	323	13.3	227	10.8	12.5	0.25
P231	ILD	1	35	1.024	5.5	96.9	38.9	3.7	17	7	1	6	64.2	25	8.9	1.7	0.2	3.84	1.49	0.53	0.1	0.01	107	3.66	34.4	94	29.2	311	13.3	272	10.2	11.4	0.28
P232	ILD	1	58	1.01	5	1.6	6.6	2.5	0	1	0	7.9	59.9	32.2	6.3	1.5	0.1	4.73	2.55	0.5	0.12	0.01	112	4.06	35.5	87.4	27.6	315	13.3	364	9.7	11	0.35
P233	ILD	1	52	1.012	7	4	78.2	39	1	14	7	5.5	57.1	25.5	9.9	6.6	0.9	3.12	1.4	0.54	0.36	0.05	91	3.27	27.4	83.8	27.9	333	13.4	368	6.1	8.5	0.226
P234	ILD	1	58	1.011	7.5	86.2	49.6	19.9	16	9	4	15.9	55.1	34	10.4	0.4	0.1	8.74	5.4	1.65	0.06	0.02	114	4.04	36.4	90.1	28.2	313	13.4	432	8.6	8.9	0.37
P235	ILD	1	64	1.015	7.5	16.8	1	1	3	0	0	7.8	68.3	23.2	6.7	1.7	0.1	5.34	1.81	0.52	0.13	0.01	113	3.75	35	93.3	30.1	323	13.5	347	8.8	8.9	0.31
P236	ILD	1	61	1.008	5	0.9	21.8	1.5	0	4	0	9.9	46.7	44.1	5.6	3.3	0.3	4.62	4.37	0.55	0.33	0.03	132	4.09	39.7	97.1	32.3	332	13.5	250	10.8	12.7	0.27
P237	ILD	1	47	1.013	6	7.8	13.5	10.8	1	2	2	5.8	70.9	20.3	8.3	0.2	0.3	4.12	1.18	0.48	0.01	0.02	133	4.25	40.6	95.5	31.3	328	13.5	404	10.4	11.9	0.42
P238	ILD	1	61	1.03	6	10.2	8.3	15.1	2	1	3	5.7	78.3	15.1	6	0.4	0.2	4.46	0.86	0.34	0.02	0.01	98	3.76	30.6	81.4	26.1	320	13.5	326	10.4	11.7	0.34
P239	ILD	1	46	1.009	7	0.9	0.2	2.2	0	0	0	7.9	71.2	21.4	3.7	3	0.7	5.61	1.68	0.29	0.24	0.06	76	3.78	24.1	63.6	20.1	316	13.6	397	7.4	0	0.295
P240	ILD	1	61	1.019	5.5	1.9	17.9	51.1	0	3	9	7.5	67.8	25.3	4.6	2	0.3	5.06	1.89	0.34	0.15	0.02	137	4.51	41.3	91.6	30.4	332	13.7	206	10.9	12.8	0.22
P241	ILD	1	46	1.012	7.5	4.9	2.7	4.3	1	0	1	4.9	63.4	26.7	8.2	1.1	0.6	3.11	1.31	0.4	0.05	0.03	87	3.71	27.6	74.5	23.4	314	13.9	349	6.9	10.3	0.241
P242	ILD	1	52	1.01	5.5	5	9.1	3.2	1	2	1	8.2	51.3	39.2	7.3	1.3	0.9	4.18	3.19	0.59	0.11	0.07	116	4.91	37	75.3	23.5	312	13.9	334	8.6	13.8	0.286
P243	ILD	1	52	1.033	6	8.5	21.1	63.8	2	4	11	8.8	65.7	27.9	6	0.3	0.1	5.75	2.45	0.53	0.03	0.01	105	3.51	31.8	90.6	29.9	330	14	264	10.9	13.1	0.29
P244	ILD	1	73	1.015	5.5	2.6	12.6	8.2	0	2	1	8.4	69.4	22.7	6.2	1.7	0	5.86	1.92	0.52	0.14	0	92	3.12	28	89.7	29.5	329	14.1	333	8.6	8.9	0.29
P245	ILD	1	60	1.013	7	3.6	22	7	1	4	1	6.4	72.3	22.8	4.2	0.5	0.2	4.62	1.46	0.27	0.03	0.01	109	3.87	33.7	87.1	28.2	323	14.1	265	9.6	9.9	0.25
P246	ILD	1	38	1.014	6	5.6	19.7	17.3	1	4	3	2.8	50.8	32.1	2.1	15	0	1.42	0.9	0.06	0.42	0	113	3.63	33.2	91.5	31.1	340	14.1	127	10.8	11.8	0.14
P247	ILD	0	60	1.022	6.5	5.3	1.2	1.5	1	0	0	8.7	71	21.5	6.8	0.6	0.1	6.19	1.87	0.59	0.05	0.01	134	4.73	41.8	88.4	28.3	321	14.2	291	9.2	10.3	0.27
P248	ILD	1	36	1.024	5.5	103.7	81.5	57.4	19	15	10	8.3	64	29.9	4	2	0.1	5.33	2.49	0.33	0.17	0.01	111	4.05	34.7	85.7	27.4	320	14.2	295	10.7	12.3	0.32
P249	ILD	0	58	1.014	6	3.4	1.4	1.6	1	0	0	6.7	66.4	25.3	6	1.9	0.4	4.45	1.7	0.4	0.13	0.03	157	4.66	46.9	100.6	33.7	335	14.2	240	9.7	10.2	0.23
P250	ILD	1	50	1.012	7	8.9	128.9	12.6	2	23	2	4.6	66.5	26	6.6	0.7	0.2	3.04	1.19	0.3	0.03	0.01	107	3.99	34.8	87.2	26.8	307	14.2	294	10.8	12.3	0.32
P251	ILD	1	53	1.017	6.5	2.4	16.1	8.9	0	3	2	7.2	61.6	29.7	7.1	1.5	0.1	4.42	2.13	0.51	0.11	0.01	113	3.84	35.6	92.7	29.4	317	14.2	388	9.4	10.1	0.37
P252	ILD	0	61	1.014	5.5	12.7	1.8	1.1	2	0	0	6	65.3	29	4.3	1.2	0.2	3.92	1.74	0.26	0.07	0.01	117	4.02	36.4	90.5	29.1	321	14.4	314	8.8	9.5	0.28
P253	ILD	1	62	1.028	6	11.1	8.6	11.2	2	2	2	6.5	52	28.5	5.7	13.3	0.5	3.37	1.85	0.37	0.86	0.03	113	3.69	34.8	94.3	30.6	325	14.4	165	10.8	12.4	0.18
P254	ILD	1	55	1.013	6.5	4.2	122.9	51.1	1	22	9	9	86.2	9.4	4.3	0.1	0	7.76	0.85	0.39	0.01	0	141	4.19	41.5	99	33.7	340	14.4	223	10.6	12.2	0.24
P255	ILD	1	65	1.01	7	2.9	35.5	16.9	1	6	3	9.3	82.2	12.8	4.7	0.3	0	7.66	1.19	0.44	0.03	0	130	4.26	38.4	90.1	30.5	339	14.5	165	10.1	10.9	0.17
P256	ILD	1	58	1.019	6.5	31.5	7	16.1	6	1	3	11.4	76.4	19.6	2.8	1.1	0.1	8.66	2.23	0.32	0.13	0.01	128	3.99	38.4	96.2	32.1	333	14.5	331	10.6	12.2	0.35
P257	ILD	1	44	1.01	7	2	5.2	2.5	0	1	0	9.8	66.9	23.2	8.4	0.6	0.9	6.53	2.26	0.82	0.06	0.09	72	2.58	22.5	87.3	28	321	10.5	77	11.3	25.5	0.087
P258	ILD	1	71	1.009	7	4.6	134.7	10.3	1	24	2	7.2	54.5	38.3	5.2	1.9	0.1	3.94	2.77	0.38	0.14	0.01	103	3.7	32	86.5	27.8	322	14.6	378	10.4	12.4	0.39
P259	ILD	1	56	1.008	7	7.6	7.8	38.3	1	1	7	9.6	55	32.5	10	1.8	0.7	5.31	3.13	0.96	0.17	0.07	134	4.49	40.2	89.5	29.8	333	14.6	369	10	11.7	0.37
P260	ILD	1	46	1.012	6.5	5.6	37.8	18.2	1	7	3	7.1	78.4	13.9	5.9	1.7	0.1	5.58	0.99	0.42	0.12	0.01	82	3.27	25.4	77.7	25.1	323	14.6	476	9.7	10.3	0.46
P261	ILD	1	68	1.012	5.5	2.1	33.5	9.8	0	6	2	6.9	64	30.2	4.5	1.3	0	4.44	2.09	0.31	0.09	0	123	4.53	39.2	86.5	27.2	314	14.6	353	9.8	11.4	0.35
P262	ILD	1	48	1.022	6	11.2	8.9	7.8	2	2	1	7.9	63.5	30.4	4.7	1.3	0.1	5.03	2.41	0.37	0.1	0.01	106	4.03	33.8	83.9	26.3	314	14.7	441	8.9	9.2	0.39
P263	ILD	1	73	1.009	6	3	1.3	0.4	1	0	0	4.9	60.4	31.7	6.7	1	0.2	2.97	1.56	0.33	0.05	0.01	102	3.67	31.9	86.9	27.8	320	14.7	388	8.8	8.7	0.34
P264	ILD	1	44	1.013	6	2.8	1.9	2.1	1	0	0	7.5	75	16.8	7.2	0.9	0.1	5.64	1.26	0.54	0.07	0.01	92	3.93	29.6	75.3	23.4	311	14.9	413	9	9.3	0.37
P265	ILD	1	49	1.024	6.5	18	18.2	53.2	3	3	10	7.7	73.3	20.7	5	0.7	0.3	5.63	1.59	0.38	0.05	0.02	102	3.71	32.2	86.8	27.5	317	14.9	396	9.6	10.5	0.38
P266	ILD	1	42	1.015	7	3.6	32	8.3	1	6	1	4.4	59.8	21	0.7	18.5	0	2.65	0.93	0.03	0.82	0	83	3.58	26.7	74.6	23.2	311	15	253	10.1	11.3	0.26
P267	ILD	1	45	1.011	6.5	1.5	1.3	1.6	0	0	0	5.6	43.2	46	8.8	1.8	0.2	2.42	2.57	0.49	0.1	0.01	86	3.64	28.2	77.5	23.6	305	15.1	403	9.6	9.6	0.38
P268	ILD	1	48	1.006	5	7.1	17.8	6.7	1	3	1	6.6	69.5	22.9	4.7	2.7	0.2	4.55	1.5	0.31	0.18	0.01	89	3.37	28.4	84.3	26.4	313	15.1	417	9.6	10.1	0.4
P269	ILD	1	64	1.008	6.5	1.2	34.6	4.1	0	6	1	11	53.4	34.8	9.9	1.3	0.6	5.86	3.83	1.09	0.14	0.07	129	3.64	38.7	106.3	35.4	333	15.1	173	11.7	14.2	0.2
P270	ILD	1	60	1.006	7	1.9	0.8	0.5	0	0	0	5.2	58.3	30	9.5	1.5	0.7	3	1.54	0.49	0.08	0.04	55	3.05	18.9	61.8	18.1	292	15.2	543	5.9	0	0.32
P271	ILD	1	48	1.017	5.5	15.1	1448.7	4.9	3	261	1	10.2	77	14.3	7.9	0.7	0.1	7.86	1.46	0.81	0.07	0.01	141	4.79	43.8	91.4	29.4	322	15.3	313	11.4	14	0.36
P272	ILD	1	51	1.01	5	7.7	6.5	3.5	1	1	1	5.2	65.9	22.4	5.2	6.3	0.2	3.45	1.17	0.27	0.33	0.01	126	4.64	38.3	82.5	27.2	329	15.4	144	9.9	12.3	0.14
P273	ILD	1	49	1.017	7	672.1	2.3	5.8	0	1	0	8.9	63.6	30.1	5.9	0.2	0.2	5.64	2.67	0.52	0.02	0.02	116	4.28	36.6	85.5	27.1	317	15.6	294	9.4	10.5	0.28
P274	ILD	1	47	1.016	5.5	6.8	9.6	7.7	1	2	1	10.1	60.6	29.5	8.2	1.5	0.2	6.13	2.98	0.83	0.15	0.02	112	4.08	35.1	86	27.5	319	15.7	360	11.3	14.3	0.41
P275	ILD	1	49	1.021	6.5	10.2	36.7	7.5	2	7	1	4.8	62.6	26.8	8.7	1.1	0.8	3	1.28	0.42	0.05	0.04	106	4.39	34.2	77.9	24.1	310	15.7	315	8.5	15.5	0.266
P276	ILD	1	70	1.011	5	5.3	11.7	1.5	1	2	0	7.7	62.2	24.3	11.4	1.1	1	4.77	1.86	0.87	0.08	0.08	84	3.21	26.2	81.6	26.1	320	16	403	6.8	9.5	0.273
P277	ILD	1	61	1.013	6.5	2.5	14	14.1	0	3	3	8.1	65.2	28.4	3.3	3.1	0	5.27	2.3	0.27	0.25	0	127	4.8	40	83.3	26.5	318	16.1	330	10.4	11.9	0.34
P278	ILD	1	50	1.006	6.5	13.3	110.2	28.6	2	20	5	6.2	64.4	24.3	6.8	4.2	0.3	3.98	1.5	0.42	0.26	0.02	95	3.35	29.4	87.8	28.4	323	16.3	271	11	12.7	0.3
P279	ILD	1	55	1.003	6.5	17	95.5	68.3	3	17	12	1.8	65.5	22.4	7.7	4.4	0	1.2	0.41	0.14	0.08	0	82	2.64	25.2	95.5	31.1	325	16.4	80	10.7	16	0.09
P280	ILD	1	63	1.014	5.5	1.5	36.3	7.8	0	7	1	11	61.3	35.6	1.7	0.9	0.5	6.7	3.9	0.19	0.1	0.06	126	4.05	40.6	100.2	31.1	310	16.7	344	11.7	13.5	0.4
P281	ILD	1	39	1.011	6	6.4	0.6	0.8	1	0	0	7.8	80.7	13.8	3.3	2.2	0	6.32	1.08	0.26	0.17	0	84	3.7	27.8	75.1	22.7	302	16.7	598	10.3	11.6	0.62
P282	ILD	1	44	1.015	6	5.2	75	25.2	1	14	5	5.4	64.6	28.4	5.2	1.8	0	3.51	1.54	0.28	0.1	0	91	3.52	28.5	81	25.9	319	17.3	395	9.4	9.4	0.37
P283	ILD	1	44	1.01	7	0.5	1.6	15.2	0	0	3	9.3	48.1	44.5	6.7	0.6	0.1	4.48	4.15	0.62	0.06	0.01	71	3.2	23.7	74.1	22.2	300	17.4	577	8.6	8.9	0.5
P284	ILD	1	50	1.01	7	0.9	4.5	5	0	1	1	8.4	59.7	31.7	7.1	1.4	0.1	5.03	2.67	0.6	0.12	0.01	78	3.41	25.5	74.8	22.9	306	17.9	698	8.8	8.7	0.62
P285	ILD	0	44	1.021	7	1.6	1	1	0	0	0	8	84.3	13.5	2.1	0	0.1	6.75	1.08	0.17	0	0.01	89	4.71	31.9	67.7	18.9	279	18.6	371	9.8	12.8	0.37
P286	ILD	1	69	1.008	7	8.5	141.9	0.7	2	26	0	7.7	68.8	21.9	3.2	6	0.1	5.29	1.69	0.25	0.46	0.01	83	3.7	27.4	74.1	22.4	303	19.7	485	10.2	11.9	0.49
P287	ILD	1	50	1.01	6.5	9.8	37.6	7.7	2	7	1	8.6	69.9	18.4	11.1	0.6	0	6	1.58	0.95	0.05	0	88	4.2	31	73.8	21	284	20.1	551	10	11.5	0.55
P288	ILD	1	43	1.01	5	555.8	71.7	20.1	100	13	4	35.1	95.9	2.1	1.3	0.7	0	33.64	0.72	0.45	0.26	0	105	4.85	34.8	71.8	21.6	302	20.8	242	9.2	10.1	0.22
P289	ILD	1	50	1.014	5.5	75.6	4672	175.6	14	841	32	7.6	69.5	24.6	5.7	0.1	0.1	5.27	1.87	0.43	0.01	0.01	117	4.22	36	85.3	27.7	325	14.2	313	10.3	11.8	0.32
P290	ILD	1	61	1.01	6.5	4.7	44.6	5.2	1	8	1	7.4	69.7	22.2	5.1	2.4	0.6	5.18	1.65	0.38	0.18	0.04	141	4.47	43.3	96.9	31.4	325	9.2	260	8.2	13.3	0.213
P291	ILD	0	55	1.026	6	4.2	5.8	4.4	1	1	1	7.5	73.7	15.3	6.8	3.6	0.6	5.5	1.14	0.51	0.27	0.04	112	3.74	34.2	91.3	30.1	329	9.4	256	7.4	11.8	0.19
P292	ILD	1	49	1.011	6.5	5.2	90.1	14.7	1	16	3	6.8	69.7	19.8	7.8	1.9	0.8	4.75	1.35	0.53	0.13	0.05	109	3.71	33.3	89.7	29.2	326	9.5	183	9.1	15.5	0.167
P293	ILD	0	53	1.021	6	6.5	4	4	1	1	1	5.9	76.1	16.7	5.7	0.7	0.8	4.49	0.98	0.34	0.04	0.05	144	4.87	44.9	92.2	29.5	320	9.5	352	8.3	13	0.293
P294	ILD	1	66	1.018	5.5	4.7	1.2	0.8	1	0	0	7.9	66.4	25.1	6.6	0.7	1.2	5.24	1.98	0.52	0.06	0.09	116	3.81	35.8	94	30.4	324	9.6	439	7.6	11.3	0.332
P295	ILD	1	59	1.021	6	5.7	13.4	3.2	1	2	1	6.9	45.3	42	7.5	4.2	1	3.11	2.89	0.52	0.29	0.07	125	4.3	39	90.6	29.1	321	9.6	321	7.3	10.3	0.234
P296	ILD	1	55	1.014	7	0.8	5.4	0.6	0	1	0	8	67.1	22.3	9	0.7	0.9	5.39	1.79	0.72	0.06	0.07	125	3.93	38.3	97.5	31.8	326	9.7	225	7.4	11.5	0.167
P297	ILD	1	38	1.023	5.5	12	60.7	10.5	2	11	2	7.6	59.4	30.8	4.7	4.2	0.9	4.48	2.32	0.35	0.32	0.07	133	4.49	40	89.1	29.6	333	9.7	237	9.3	18	0.221
P298	ILD	1	62	1.019	5.5	1.4	16	14.7	0	3	3	8.3	52.5	37.4	6.6	2.4	1.1	4.34	3.1	0.55	0.2	0.09	127	3.79	38.8	102.3	33.4	326	9.8	275	8.6	15.3	0.236
P299	ILD	1	52	1.021	5.5	2.3	16.6	15.7	0	3	3	8.5	64.6	25.1	7.4	1.9	1	5.49	2.13	0.63	0.16	0.08	118	4.27	36.8	86.1	27.6	321	9.8	292	7.3	11.5	0.213
P300	ILD	1	51	1.008	5	8.4	11	68.7	2	2	12	8.9	69.4	21.4	6.4	1.9	0.9	6.17	1.9	0.57	0.17	0.08	115	3.93	35.6	90.4	29.2	323	9.9	442	8.5	13.8	0.373
P301	ILD	1	49	1.019	6.5	6	1.4	8.2	1.1	0.3	1.5	6.2	65.1	22.2	12	0.5	0.2	4.02	1.37	0.74	0.03	0.01	115	3.95	34.9	68.4	29.1	330	13.8	205	10.8	12.1	0.22
P302	ILD	1	52	1.025	5.5	7.8	141.9	3.9	1	26	1	5.6	58.9	35.9	3.9	1.1	0.2	3.31	2.02	0.22	0.06	0.01	133	4.35	39.9	91.7	30.6	333	13	244	12.5	16.3	0.31
P303	ILD	1	39	1.022	5.5	0.7	2.8	1.9	0	1	0	3.7	63.1	28.5	6.5	1.6	0.3	2.33	1.05	0.24	0.06	0.01	99	3.93	32	81.4	25.2	309	15.2	257	12.1	17.8	0.31
P304	ILD	1	61	1.013	6	75.6	969.8	14.5	13.6	172.8	2.6	9.7	73.4	19.8	5.7	1	0.1	7.14	1.93	0.56	0.1	0.01	94	3.98	31.1	78.1	23.6	302	14.4	448	9.6	10.8	0.43
P305	ILD	1	54	1.009	5	6	47.5	6.4	1	9	1	8.2	66.5	24.2	8.7	0.5	0.1	5.42	1.97	0.71	0.04	0.01	130	4.17	38.1	91.4	31.2	341	12.9	368	9.4	10.1	0.35
P306	ILD	1	45	1.006	7	0.8	13.7	8.7	0	2	2	9.5	85.9	10.7	2.6	0.6	0.2	8.19	1.02	0.25	0.06	0.02	108	4.84	35.2	72.7	22.3	307	20.8	457	9.3	10.7	0.43
P307	ILD	1	57	1.016	7.5	3.2	119.3	0.4	0.6	21.5	0.1	9	69.4	23.4	5.8	1.2	0.2	6.21	2.09	0.52	0.11	0.02	118	4.17	35.8	85.9	28.3	330	13	338	10	10.4	0.34
P308	ILD	1	65	1.023	5.5	2.6	3.9	4.4	0.5	0.7	0.8	7.8	76.6	14.3	6.7	2.1	0.3	5.94	1.11	0.52	0.16	0.02	114	3.86	25.1	90.9	29.5	325	12.5	403	8.8	9	0.35
P309	ILD	1	65	1.01	5.5	0.8	52.4	1.9	0	9	0	7.1	56.3	34.2	7.4	2	0.1	3.97	2.41	0.52	0.14	0.01	140	4.64	42.7	92	30.2	328	12.4	287	10.8	13.1	0.31
P310	ILD	1	65	1.011	7	2.4	2.3	1.3	0	0	0	8.1	54.6	30.4	9	5.1	0.6	4.41	2.46	0.75	0.41	0.05	142	4.7	44	92.6	29.9	325	13.2	362	10.1	11.5	0.35
P311	ILD	1	41	1.017	6.5	6.5	6.1	6.4	1.2	1.1	1.2	4.4	36.3	49.4	9.7	4.4	0.2	1.58	2.15	0.42	0.19	0.01	128	4.01	38.8	96.8	31.9	330	13.1	167	13.2	17.6	0.22
P312	ILD	1	59	1.014	6	0.9	3.4	0.6	0.2	0.6	0.1	5.1	58.6	31.6	5.7	3.9	0.2	2.99	1.61	0.29	0.2	0.01	128	4.54	40	88.1	28.2	320	14	255	10.1	11	0.26
P313	ILD	1	73	1.01	5	4.7	10.5	2.5	1	2	0	7.5	70.1	19.9	8.4	1.5	0.1	5.26	1.49	0.63	0.11	0.01	73	3.13	24.4	78	23.3	299	16.4	369	9	9.3	0.33
P314	ILD	1	59	1.013	6.5	4.7	6.3	1.8	0.8	1.1	0.3	7.7	63.7	26.9	6.5	2.5	0.4	4.87	2.06	0.5	0.19	0.03	128	4.53	40.5	89.4	28.3	316	13.7	238	12.5	16.8	0.3
P315	ILD	1	53	1.016	6.5	4.6	10.5	1.5	0.8	1.9	0.3	9.6	69.8	16.8	5.4	7.9	0.1	6.67	1.61	0.52	0.76	0.01	98	3.74	31.1	83.2	26.2	315	15.5	621	10.7	12.7	0.66
P316	ILD	1	54	1.014	6	0.4	1.2	0.4	0.1	0.2	0.1	4.8	48.5	44.2	5.2	1.9	0.2	2.35	2.14	0.25	0.09	0.01	136	5.18	43.4	83.8	26.3	313	14.6	164	11.3	14.9	0.19
P317	ILD	1	46	1.012	7	1.5	2.6	4.6	0	0	1	7.7	65.7	24.7	7.9	1.6	0.1	5.07	1.91	0.61	0.12	0.01	101	3.66	32.6	89.1	27.6	310	14.2	569	10.6	12.1	0.6
P318	ILD	1	44	1.005	6.5	16.5	43.3	80.5	3	8	14	1.9	57.5	32.4	4.8	5.3	0	1.08	0.61	0.09	0.1	0	104	3.71	31.2	84.1	28	333	13.5	81	11.4	14.8	0.09
P319	ILD	1	81	1.006	5	0.6	40.2	3.6	0.1	7.2	0.7	4	45.8	46.1	5.8	2	0.3	1.81	1.82	0.23	0.08	0.01	118	3.94	36.3	92.1	29.9	325	13.3	189	11.9	14.7	0.23
P320	ILD	1	44	1.023	6	16.5	22.5	24.2	3	4.1	4.4	13.2	75.2	22.3	2.3	0.2	0	9.94	2.94	0.31	0.02	0	115	4.13	38.1	92.3	27.8	302	14.6	374	10	11.2	0.37
P321	ILD	1	68	1.019	5	11.7	53.9	20.6	2.1	9.7	3.7	6.1	62.3	28.8	7.4	1.2	0.3	3.78	1.75	0.45	0.07	0.02	89	2.91	26.8	92.1	30.6	332	15.2	304	9.8	10.6	0.3
P322	ILD	1	51	1.039	6	8.7	7.1	7.2	1.6	1.3	1.3	5.1	69	21.4	8.2	1.2	0.2	3.54	1.1	0.42	0.06	0.01	122	3.95	36.7	92.9	30.9	332	13.9	211	10.3	10.4	0.22
P323	ILD	1	65	1.01	7	5.2	1	0.5	0.9	0.2	0.1	4.4	56	30.8	10	2.7	0.5	2.46	1.35	0.44	0.12	0.02	88	3.37	28.8	85.5	26.1	306	16.1	322	9.5	10	0.3
P324	ILD	1	56	1.016	7	10.6	32.2	8.2	1.9	5.8	1.5	4	58.4	31.8	9.5	0	0.3	2.33	1.27	0.38	0	0.01	107	3.55	31.9	89.9	31.1	335	14.2	107	12.9	16.4	0.14
P325	ILD	1	53	1.016	5.5	2.7	16.9	7.9	0.5	3	1.4	5.8	52.8	29	7.8	10.4	0	3.04	1.67	0.45	0.6	0	119	3.97	36.6	92.2	30	325	12.7	170	11.7	14.9	0.2
P326	ILD	1	39	1.016	6	4.3	7.2	11	1	1	2	4.2	53	37.2	8.6	1	0.2	2.22	1.56	0.36	0.04	0.01	95	3.84	31.1	81	24.7	305	15.3	247	11.5	14.7	0.31
P327	ILD	1	68	1.015	7	8.4	32.4	15.6	2	6	3	8.9	77.6	11.2	8	3.1	0.1	6.93	1	0.71	0.28	0.01	116	4.16	36.2	87	27.9	320	13.2	408	9.2	9.5	0.38
P328	ILD	1	48	1.012	6.5	14.3	39.8	35.7	3	7	6	7.8	61.5	27.4	9.5	1.5	0.1	4.77	2.13	0.74	0.12	0.01	94	3.52	29.3	83.2	26.7	321	14	398	9.5	10.6	0.38
P329	ILD	1	42	1.028	6	3.6	3.9	5.4	0.6	0.7	1	5.3	78.8	15.5	2.5	3.2	0	4.16	0.82	0.13	0.17	0	100	3.48	32	92	28.7	313	13.4	388	8.7	8.8	0.34
P330	ILD	0	57	1.02	6	3	1.5	1.4	0.6	0.3	0.3	5.8	81.6	17.3	0.9	0	0.2	4.77	1.01	0.05	0	0.01	88	4.09	31.2	76.3	21.5	282	18.2	233	10.7	13	0.25
P331	ILD	1	56	1.011	6.7	5.9	126	34.2	1.6	22.7	4.2	7.6	65.5	24.5	6.6	3.4	0	4.97	1.86	0.5	0.26	0	121	4	8.3	95.8	30.3	316	12	291	10.4	12.1	0.3
P332	ILD	1	62	1.011	6	0.2	1.1	0.5	0	0.2	0.1	7	54	35.3	8.9	1.7	0.1	3.76	2.46	0.62	0.12	0.01	130	4.05	39.1	96.5	32.1	332	13.3	242	10.9	12.4	0.26
P333	ILD	0	50	1.032	6	3.6	4.9	2	1	1	0	6	61.5	22.8	11.9	3.5	0.3	3.67	1.36	0.71	0.21	0.02	128	4.44	39.3	88.5	28.8	326	12.5	329	10.3	11.6	0.34
P334	ILD	1	58	1.005	6.5	6.4	3	1.6	1.2	0.5	0.3	7.5	75	19.2	5.2	0.5	0.1	5.58	1.43	0.39	0.04	0.01	112	3.97	34.7	87.4	28.2	323	14.6	300	10.4	11.8	0.31
P335	ILD	0	41	1.022	6.522	10.2	2.5	1.5	1.8	0.5	0.3	6.8	70.1	21	5.9	2.9	0.1	4.78	1.43	0.4	0.2	0.01	128	4.54	39.3	86.6	28.2	326	13.8	495	9.5	10.2	0.47
P336	ILD	1	49	1.014	7	6	17.5	26.9	1	3	5	14.4	66.4	21.6	5.9	1.7	0.4	10.09	3.1	0.85	0.25	0.06	139	4.56	42.2	92.5	30.5	329	14.4	362	10.3	11.2	0.37
P337	ILD	1	57	1.029	5.5	15.3	16.5	17.9	2.8	3	3.2	5.4	65.8	24.8	7	2.2	0.2	3.55	1.34	0.38	0.12	0.01	102	3.72	32.7	87.9	27.4	312	13.1	280	9.5	9.9	0.27
P338	ILD	1	47	1.022	6.522	24.5	425.4	31.7	4.4	76.6	5.7	4.6	60.7	29.7	9	0.2	0.4	2.78	1.36	0.41	0.01	0.02	98	4.08	32.1	78.7	24	305	14.4	394	9.8	10.3	0.39
P339	ILD	1	59	1.018	7.5	11.6	595.7	25.4	2.1	107.2	4.6	4.6	58.1	31.1	8.8	2	0	2.65	1.42	0.4	0.09	0	114	3.72	32.8	88.3	30.6	348	13.1	291	9	9.4	0.26
P340	ILD	0	41	1.036	5.5	4.7	18.3	3.3	0.8	3.3	0.6	6.2	60.6	31.7	6.4	1.1	0.2	3.77	1.97	0.4	0.07	0.01	125	4.34	38.9	89.6	28.8	321	15.4	289	9.1	9.4	0.26
P341	ILD	1	46	1.018	7	12.1	3.2	3	2.2	0.6	0.5	5.1	53.9	33.1	6.1	6.5	0.4	2.72	1.67	0.31	0.33	0.02	116	4.01	36.1	90	28.9	321	14.4	334	9.6	10	0.32
P342	ILD	1	44	1.013	7	1.5	1.5	1.6	0.3	0.3	0	5.8	64.1	24.3	10	1.4	0.2	3.72	1.41	0.58	0.08	0.01	50	3.68	21.3	57.9	13.6	235	20.4	425	9.1	10.5	0.39
P343	ILD	1	48	1.01	7	9.5	2.8	1.6	1.7	0.5	0.3	5.3	60.2	30	92	0.4	0.2	3.21	1.6	0.49	0.02	0.01	79	2.76	25.5	92.4	28.6	310	16.9	228	9.7	10.6	0.22
P344	ILD	0	44	1.035	5.5	14.5	3.2	0.8	2.6	0.6	0.1	7.5	66.4	24.1	7.2	2.3	0	4.95	1.8	0.54	0.17	0	143	4.68	41.9	89.5	30.6	341	12.3	295	11.2	13.8	0.33
P345	ILD	1	65	1.01	6.5	2.1	26.3	16.8	0.4	4.7	3	8.1	70.5	24.1	4.6	0.6	0.2	5.68	1.94	0.37	0.05	0.02	121	4.02	36.5	90.8	30.1	332	13.4	347	11.9	15.2	0.41
P346	ILD	1	52	1.007	7	1.5	22.8	11.5	0.3	4.1	2.1	8.8	70.4	20.3	7.2	1.9	0.2	6.16	1.78	0.63	0.17	0.02	108	3.83	34.6	90.3	28.2	312	14.5	329	10.2	11.7	0.33
P347	ILD	1	58	1.011	6.5	12.3	46.2	18.9	2	8	3	5.3	64.4	29.9	5.1	0.6	0	3.42	1.59	0.27	0.03	0	92	3.36	28.7	85.4	27.4	321	13.3	349	9.4	10	0.33
P348	ILD	1	57	1.023	6.5	29.4	96	28.6	5.3	17.3	5.1	7.2	68.2	22.5	5.7	3.5	0.1	4.88	1.61	0.41	0.25	0.01	119	4.03	36.2	89.8	29.5	329	13.9	256	10.9	12.5	0.28
P349	ILD	1	56	1.016	5.5	3	7.5	7.3	0.5	1.4	1.3	8.6	66.5	24.8	7.8	0.7	0.2	5.72	2.13	0.67	0.06	0.02	131	4.31	40.4	93.7	30.4	324	14	352	10.2	12	0.36
P350	ILD	1	65	1.009	5.5	1.6	2.5	2.8	0	0	1	6.5	66.1	22.2	10.2	1.2	0.3	4.26	1.43	0.66	0.08	0.02	117	3.83	37.2	97.1	30.5	315	13.5	257	10.8	12.3	0.28
P351	ILD	1	63	1.014	5.5	4.7	4.2	9.6	0.8	0.8	1.7	7.1	68.1	19.6	8.8	3.1	0.4	4.85	1.4	0.63	0.22	0.03	102	3.72	31.2	83.9	29.4	327	15.1	448	9.6	10.1	0.43
P352	ILD	1	52	1.015	5.5	3.6	130.1	11.7	0.6	23.4	2.1	7.5	55.8	36.9	4.8	2	0.5	4.16	2.75	0.36	0.15	0.04	120	4.25	38	89.4	28.2	316	13.2	325	11	12.6	0.36
P353	ILD	1	46	1.023	6.5	19.3	120.4	24.9	3.5	21.7	4.5	8.7	58	32.9	6	3	0.1	5.05	2.86	0.52	0.26	0.01	78	3.27	25.1	76.8	23.9	311	16.5	480	9.1	9.6	0.44
P354	ILD	0	55	1.008	5.5	0.9	1.1	1.5	0.2	0.2	0.3	8.8	64.1	16.5	2.1	17.1	0.2	5.61	1.44	0.18	1.5	0.02	90	2.94	28.1	95.6	30.6	320	14	426	9.9	10.8	0.42
P355	ILD	1	62	1.022	5.555	15.3	35.2	17.5	2.8	6.3	3.2	8.9	63.5	24	10.4	1.9	0.2	5.62	2.12	0.92	0.17	0.02	125	4.51	39.2	86.9	27.7	319	14.6	361	10.1	12.2	0.36
P356	ILD	1	64	1.009	5.5	3.2	7.2	1.4	0.6	1.3	0.3	6.8	56.8	35.5	6.1	1.6	0.1	3.87	2.43	0.42	0.11	0.01	122	4.1	37.2	90.7	29.8	328	13	316	9.9	11.3	0.31
P357	ILD	1	60	1.019	6	3.4	60.5	13.6	0.6	10.9	2.4	5.9	63.4	27.8	7.9	0.7	0.2	3.76	1.65	0.47	0.04	0.01	119	3.96	36.2	91.4	30.1	329	13.4	280	11.2	14.2	0.31
P358	ILD	1	62	1.019	5.5	34.5	60	122.3	6	11	22	8.8	79.5	13.9	5.9	0.6	0.1	6.98	1.22	0.52	0.05	0.01	113	3.98	35.9	90.2	28.4	305	14.8	309	9.5	10.7	0.29
P359	ILD	1	57	1.027	6	2.8	4	0.4	1	1	0	5.2	50.4	40.9	5	3.3	0.4	2.63	2.13	0.26	0.17	0.02	113	5.1	35.9	71.7	22.6	315	15.5	196	10.1	14.5	0.2
P360	ILD	1	51	1.008	6.5	0.9	5	1.6	0.2	0.9	0.3	3.6	39.9	40.4	3.7	15.7	0.3	1.42	1.44	0.13	0.56	0.01	115	4.26	35.7	83.8	27	322	15.3	179	10.7	13.1	0.19
P361	ILD	1	60	1.024	5.6	15.3	5.7	22.2	2.8	1	4	5.6	45.7	41	10.8	2	0.5	2.57	2.31	0.61	0.11	0.03	117	3.73	34.4	92.2	31.4	340	13.6	227	10.6	12.1	0.24
P362	ILD	1	58	1.018	5.5	9.1	10.3	12.2	1.6	1.9	2.2	7.5	60	32.6	5	2	0.4	4.48	2.43	0.37	0.15	0.03	118	4.14	36.6	88.4	28.5	322	13.2	374	10.3	12	0.39
P363	ILD	0	56	1.028	6.5	16.9	1.2	1.4	3	0.2	0.3	8.4	58.9	30.4	8.6	1.7	0.4	4.94	2.55	0.72	0.14	0.03	141	4.49	43.6	97.1	31.4	323	13.6	312	9.2	9.6	0.29
P364	ILD	1	45	1.011	6	11.3	74.6	68	2	13.4	12.2	10	63.3	27.4	8.1	0.9	0.3	6.34	2.75	0.81	0.09	0.03	131	4.7	41.1	87.4	27.9	319	14.2	316	9.7	10.7	0.31
P365	ILD	1	51	1.02	5.5	51.8	35.3	121	9.3	6.4	21.8	5.5	57.5	31.1	5.5	5.5	0.4	3.17	1.71	0.3	0.3	0.02	130	4.22	38.7	91.7	30.8	336	13.7	318	9.8	10.9	0.31
P366	ILD	1	46	1.012	7	11.7	3.5	5.1	2	1	1	8.5	79	10	9.5	1.4	0.1	6.7	0.85	0.81	0.12	0.01	119	4.31	37.5	87	27.6	317	13.9	300	11.5	13.6	0.34
P367	ILD	1	60	1.011	7	2.3	9.9	4.9	0	2	1	6.3	56.7	33.4	7	2.4	0.5	3.59	2.11	0.44	0.15	0.03	112	4.27	36.3	85	26.2	309	14.5	443	8.5	8.7	0.38
P368	ILD	1	49	1.021	6.5	4.6	19	31.5	0.8	3.4	5.7	6	62.9	27.2	7.9	1.5	0.5	3.75	1.62	0.47	0.09	0.03	110	3.9	34.3	87.9	28.2	321	13.6	223	9.9	11.7	0.22
P369	ILD	1	52	1.026	5	6.4	4.3	2.9	1.2	0.8	0.5	8.7	50.1	39.4	6.8	3.5	0.2	4.33	3.41	0.59	0.3	0.02	103	3.78	32.3	85.4	27.2	319	13.9	324	9.3	9.8	0.3
P370	ILD	0	63	1.012	7.5	101.4	6.7	1	18	1	0	6.5	72.5	13.6	11.8	1.8	0.3	4.73	0.89	0.77	0.12	0.02	111	3.65	33.1	90.7	30.4	335	12.6	319	9.5	10.1	0.3
P371	ILD	1	59	1.011	6.5	4.7	28.3	4.2	0.8	5.1	0.8	8.4	72.7	16.5	8.5	1.8	0.5	6.11	1.39	0.71	0.15	0.04	125	4.23	37.2	87.9	29.6	336	13.9	283	10.1	12.1	0.29
P372	ILD	1	48	1.016	6	15.3	11.7	23.3	2.8	2.1	4.2	4.1	64.4	29	5.9	0.7	0	2.62	1.18	0.24	0.03	0	122	3.93	36.3	92.4	31	336	12.9	225	10.1	10.9	0.23
P373	ILD	1	57	1.011	5.5	15.6	324.7	34.1	3	58	6	4.3	68.1	21.4	7.4	2.6	0.5	2.93	0.92	0.32	0.11	0.02	94	3.6	30.2	83.9	26.1	311	13.1	363	9.4	10.4	0.34
P374	ILD	1	46	1.016	7	30.5	45.3	48.9	5.5	8.2	8.8	6.4	68.7	17.3	11.8	2	0.2	4.41	1.11	0.76	0.13	0.01	117	3.88	34.3	88.4	30.2	341	13	464	10.2	11.7	0.47
P375	ILD	1	56	1.023	7	13.2	113.8	19.5	2.4	20.5	3.5	4.7	62.6	23.2	6.4	6.7	1.1	2.92	1.08	0.3	0.31	0.05	120	3.95	36.5	92.4	30.4	329	13.6	192	10.4	11.8	0.2
P376	ILD	1	44	1.025	6.5	3203.4	19.5	12.6	576.6	3.5	2.3	12.3	85.9	7.9	5.1	1	0.1	10.55	0.97	0.63	0.12	0.01	103	3.44	31.7	92.2	29.9	325	12.4	353	9.5	10	0.34
P377	ILD	1	66	1.023	6.5	45.3	6.8	18.4	8.2	1.2	3.3	10.5	91.5	5.3	3.1	0.1	0	9.6	0.56	0.32	0.01	0	102	3.22	31.9	99.1	31.7	320	15	270	10.5	11.9	0.28
P378	ILD	0	85	1.019	7	2.3	5	4.9	0.4	0.9	0.9	11.7	71.5	21.1	5.7	1.5	0.2	8.34	2.46	0.66	0.17	0.02	117	3.88	35.6	91.8	30.2	329	15.6	317	10.3	11.4	0.33
P379	ILD	1	61	1.013	6	7.4	1.5	2.3	1.3	0.3	0.4	13.4	69.1	14.5	6.1	9.9	0.4	9.28	1.94	0.82	1.33	0.05	97	3.63	31.1	85.7	26.7	312	15.8	315	9.8	11.5	0.31
P380	ILD	1	64	1.019	6.5	1	4.3	2.7	0.2	0.8	0.5	8.1	53.1	38.1	4.2	4.4	0.2	4.31	3.1	0.34	0.36	0.02	128	4.16	37.9	91.1	30.8	338	13.3	398	10.1	11.6	0.4
P381	ILD	1	53	1.018	5	3.9	66.2	9.2	0.7	11.9	1.7	4.4	51.4	35.9	7.9	3.4	1.4	2.28	1.59	0.35	0.15	0.06	133	4.49	38.6	86	29.6	345	12.5	238	10.5	12.3	0.25
P382	ILD	1	51	1.022	5.5	5.7	77	13.3	1	13.9	2.4	6.8	58.1	28.7	8.4	4.4	0.4	3.91	1.94	0.57	0.3	0.03	105	3.5	33.2	94.9	30	316	13.9	285	9.8	10.8	0.28
P383	ILD	1	62	1.008	7	1.2	2.2	1.6	0.2	0.4	0.3	4.7	57.1	35.1	5.9	1.7	0.2	2.7	1.66	0.28	0.08	0.01	116	3.92	35.8	91.3	29.6	324	12.4	183	11.1	13.2	0.209
P384	ILD	1	63	1.02	6.5	10.1	32.4	16.4	2	6	3	13.4	87.9	8.5	3.4	0.1	0.1	11.74	1.14	0.46	0.01	0.01	111	3.77	33	87.6	29.4	336	12.9	348	11.4	14.1	0.4
P385	ILD	1	63	1.019	5	6.3	17.9	12.3	1	3	2	7.9	53.9	37.6	6.6	1.6	0.3	4.26	2.97	0.52	0.13	0.02	140	4.44	43.7	98.4	31.5	320	13.6	209	10.9	13.3	0.23
P386	ILD	1	41	1.016	6.5	2.4	25.3	21.1	0.4	4.6	3.8	5.5	40.5	62.9	5.3	1.1	0.2	2.24	2.92	0.29	0.06	0.01	110	3.58	34.1	95.3	30.7	323	13.1	252	9.9	10.8	0.25
P387	ILD	1	55	1.013	6.5	4.4	0.9	2.3	0.8	0.2	0.4	6.3	47.2	45.7	6.8	0.3	0	2.99	2.9	0.43	0.02	0	82	3.19	27.3	85.6	25.7	300	17.5	518	9.7	10.3	0.5
P388	ILD	1	76	1.013	7.5	10.3	8.4	14.4	1.9	1.5	2.6	6.8	66.3	37.2	4.1	2.4	0	4.48	1.84	0.28	0.16	0	105	4.09	34.4	84.1	25.7	305	16.2	480	8.5	8.7	0.41
P389	ILD	1	31	1.02	7.5	10.2	53.7	60.3	1.8	9.7	10.9	9.5	72.8	14.9	10.8	1.5	0	6.93	1.42	1.03	0.14	0	115	3.69	33.7	91.3	31.2	341	13.4	265	9.6	10.3	0.26
P390	ILD	1	52	1.038	6	7	38.6	13.6	1.3	6.9	2.4	14.4	82.4	11.3	5.1	1.1	0.1	11.85	1.62	0.74	0.16	0.02	125	4.19	39	93.1	29.8	321	12.8	488	8.7	8.9	0.42
P391	ILD	0	46	1.022	6.5	3.5	17.8	20.9	0.6	3.2	3.8	14.4	69.7	25.6	4.1	0.5	0.1	10.02	3.68	0.59	0.07	0.02	122	3.46	36.3	104.9	35.3	336	14.3	342	9.8	10.7	0.34
P392	ILD	1	52	1.0266	6	15.3	30	32.9	2.8	5.4	5.9	5.5	62	27.9	8.2	1.5	0.4	3.42	1.54	0.45	0.08	0.02	115	4.09	35.1	85.8	28.1	328	14	353	10.1	11.3	0.36
P393	ILD	1	57	1.036	6	15.3	15.4	4.3	2.8	2.8	0.8	5.9	54.8	33.4	7.7	3.6	0.5	3.22	1.96	0.45	0.21	0.03	114	3.99	34.6	85.7	28.6	329	13.4	275	9.2	9.8	0.25
P394	ILD	1	59	1.016	6.5	2.2	39.8	4.4	0.6	7.2	0.8	7	68	23.4	7.1	1.4	0.1	4.76	1.64	0.5	0.1	0.01	112	4.39	35.7	81.3	25.5	314	13.4	366	9.4	9.8	0.34
P395	ILD	1	59	1.021	5	3.9	8.2	2.2	0.7	1.5	0.4	7.6	45.6	44.6	7.7	1.7	0.4	3.45	3.37	0.58	0.13	0.03	130	4.31	29.9	92.6	30.2	326	13.4	270	12.4	17	0.34
P396	ILD	1	62	1.003	5	0.6	0.5	1.3	0.1	0.1	0.2	5.1	64.4	28.7	5.7	1	0.2	3.31	1.47	0.29	0.05	0.01	132	4.26	38.2	89.7	31	346	12.7	228	9.9	11	0.23
P397	ILD	1	76	1.01	5.5	3.6	8.9	4.3	0.6	1.6	0.8	9.4	69.3	22.5	5.8	2.3	0.1	6.94	2.11	0.54	0.22	0.01	129	4.28	38.9	90.9	30.1	332	13.2	307	10.7	11.7	0.33
P398	ILD	1	63	1.011	6.5	3	31	8.8	0.5	5.6	1.6	4.3	53.7	34.7	9.8	1.6	0.2	2.29	1.48	0.42	0.07	0.01	103	3.9	33.7	86.4	26.4	305	13.9	264	11.4	14.6	0.3
P399	ILD	0	50	1.028	6	1.7	9.5	0.8	0.3	1.7	0.1	6.9	60.8	24.7	9.9	4.2	0.4	4.18	1.7	0.68	0.29	0.03	121	3.88	36.2	93.3	31.2	334	13	261	11.1	12.5	0.29
P400	ILD	1	71	1.016	6.5	7.1	22	5.1	1.3	4	0.9	7.7	68.6	22.8	6.2	2.3	0.1	5.27	1.75	0.48	0.18	0.01	121	3.9	38	97.4	31	318	12.6	309	10.3	11.5	0.32
P401	ILD	1	59	1.008	5.5	43	106.3	0.6	8	19	0	11.8	63.9	30	4.1	2	0	7.53	3.53	0.48	0.23	0	124	4.01	37.2	92.8	30.9	333	13.7	280	9.6	10.5	0.27
P402	ILD	1	56	1.019	6.5	7.1	4.5	4.1	1	1	1	6.6	55.3	36.8	6.1	1.5	0.3	3.66	2.43	0.4	0.1	0.02	112	3.97	37.4	94.2	28.2	299	14.1	285	10.5	11.9	0.3
P403	ILD	1	58	1.019	6	6.8	75.8	2.6	1	13	0	5.3	60	30.4	5.8	3.4	0.4	3.2	1.62	0.31	0.18	0.02	122	4.17	38	91.1	29.3	321	12.6	250	10.9	12.5	0.27
P404	ILD	1	51	1.017	5.5	566.3	147.8	14.3	101.9	26.6	2.6	6	83.7	10.6	5.3	0.2	0.2	5.05	0.64	0.32	0.01	0.01	101	4.3	32.5	75.6	23.5	311	16.2	329	11	13.4	0.36
P405	ILD	1	51	1.007	6	0.9	4.7	6.1	0	1	1	6.1	67	22	7.5	3	0.5	4.09	1.34	0.46	0.18	0.03	72	3.53	24.2	68.6	20.4	298	17.3	538	9.6	10.7	0.52
P406	ILD	0	62	1.017	5.5	0.8	1.3	0.1	0.1	0.2	0	7.4	59.4	28.3	10	1.9	0.4	4.4	2.1	0.74	0.14	0.03	142	4.37	41.4	94.7	32.5	343	13.9	220	9.9	10.7	0.22
P407	ILD	1	54	1.019	6.5	4.3	28.3	3	0.8	5.1	0.5	10.4	69.9	16.7	6.1	7.1	0.2	7.26	1.74	0.63	0.74	0.02	121	4.21	36.7	87.2	28.7	330	13	276	10.9	12.8	0.3
P408	ILD	1	44	1.012	6	2.9	2.5	2.1	0.5	0.5	0.4	2.9	39.4	50.7	8.6	1	0.3	1.14	1.47	0.25	0.03	0.01	99	3.8	32.4	55.3	26.1	306	14.2	298	10.7	11.9	0.32
P409	ILD	1	49	1.009	5.5	3.3	3	0.5	0.6	0.5	0.1	6.1	39.5	42.4	4.8	13	0.3	2.4	2.58	0.29	0.79	0.02	130	4.2	39.8	94.8	31	327	12.6	249	10.8	13.1	0.27
P410	ILD	1	58	1.017	6.5	4.3	54	10.2	0.8	9.7	1.8	7.3	56.5	34.4	6.9	1.8	0.4	4.12	2.51	0.5	0.13	0.03	124	3.92	37.2	94.9	31.6	333	14	310	10.1	11.5	0.31
P411	ILD	0	56	1.022	6.5	15.3	7.2	5.7	2.8	1.3	1	6.2	65.4	27.3	6.6	0.5	0.2	4.05	1.69	0.41	0.03	0.01	121	3.8	37.8	99.5	31.8	320	15.9	144	11.1	14	0.16
P412	ILD	1	22	1.025	6.5	11.6	58.9	18	2	11	3	9.9	37.2	58.1	3.6	1	0.1	3.69	5.77	0.36	0.1	0.01	136	4.34	39.9	91.9	31.3	341	13.1	318	10	11.2	0.32
P413	ILD	1	61	1.009	7	15.3	5.1	4.6	2.8	0.9	0.8	7.4	63.6	27.3	8.2	0.8	0.1	4.68	2.01	0.6	0.06	0.01	104	4.1	33.6	82	25.4	310	16.2	470	8.8	8.7	0.41
P414	ILD	1	49	1.011	5.5	3.9	35.3	9.9	0.7	6.4	1.8	7.1	66.9	21.5	6.7	4.6	0.3	4.76	1.53	0.48	0.33	0.02	112	3.92	35.9	91.6	28.6	312	12.5	291	10.8	12.9	0.31
P415	ILD	1	58	1.025	6	2.3	15.8	29.1	0.4	2.8	5.2	6.5	60.7	26.6	9.2	2.9	0.6	3.96	1.74	0.6	0.19	0.04	113	3.75	34.6	92.3	30.1	327	16.8	212	11.4	13.9	0.24
P416	ILD	1	36	1.008	5	2.6	10.2	2.6	0.5	1.8	0.5	2.8	57.3	29.4	12.9	0	0.4	1.6	0.82	0.36	0	0.01	108	4.6	34.1	74.1	23.5	317	14.8	322	11	13.5	0.35
P417	ILD	1	46	1.012	6	4	2.8	1.9	0.7	0.5	0.3	6.9	56.9	34.9	6.5	1.6	0.1	3.94	2.42	0.45	0.11	0.01	108	4	33.7	84.3	27	320	15.4	390	10.6	12.2	0.41
P418	ILD	1	40	1.015	6.5	2.3	14.7	6.5	0.4	2.7	1.2	14.4	82	13.6	4.2	0.1	0.1	11.77	1.96	0.61	0.01	0.01	45	2.49	18.1	72.7	18.1	249	21.2	428	9.6	10.9	0.41
P419	ILD	1	31	1.023	5.5	5.8	1.2	1	1	0.2	0.2	6.6	63.2	29.3	6.4	0.5	0.6	4.16	1.93	0.42	0.03	0.04	130	4.75	39	82.1	27.4	333	15.7	231	11.3	13.9	0.26
P420	ILD	1	62	1.021	6.5	0.4	3.3	9.9	0	1	2	3.1	55.3	36.1	6.7	1.6	0.3	1.73	1.13	0.21	0.05	0.01	100	3.36	32.4	96.4	29.8	309	14.4	153	10.3	11	0.16
P421	ILD	1	58	1.014	7	17.2	11.2	2.8	3	2	1	11	72.5	21.5	4.7	1	0.3	7.97	2.36	0.52	0.11	0.03	102	4.03	32.8	81.4	25.3	311	14.2	445	8.6	8.7	0.38
P422	ILD	1	51	1.013	6.5	67.1	7.6	7.3	12.1	1.4	1.3	5.9	67.1	22.9	8.3	1.4	0.3	3.95	1.35	0.49	0.08	0.02	91	4.33	30.8	71.1	21	295	16.9	376	10.4	12.8	0.39
P423	ILD	1	42	1.006	6	3.9	15.3	2.8	0.7	2.8	0.5	7.5	73.5	19.4	6.8	0.3	0	5.51	1.45	0.51	0.02	0	99	3.28	30	91.5	30.2	330	13.6	207	10.4	12.3	0.21
P424	ILD	1	56	1.01	6	4.3	35.3	2.3	0.8	6.4	0.4	6.2	49.1	30.6	12	8	0.3	3.02	1.88	0.74	0.49	0.02	74	3.04	25.4	83.6	24.3	291	16.1	380	8.7	8.5	0.33
P425	ILD	1	43	1.025	5.5	27.5	25.9	8.7	5	4.7	1.6	6.9	67.1	20.1	10.3	2.2	0.3	4.61	1.38	0.71	0.15	0.02	111	3.96	34.6	87.4	28	321	12.9	421	9.6	10.5	0.41
P426	ILD	0	37	1.031	6	10.1	17.8	13.8	2	3	2	5.6	62.2	24.3	7.3	6	0.2	3.5	1.37	0.41	0.34	0.01	111	4.9	37.7	76.9	22.7	294	17.6	276	10.5	11.7	0.29
P427	ILD	1	60	1.021	5	4.6	1.6	2.5	0.8	0.3	0.5	5.1	47.1	35.7	12.5	3.9	0.8	2.41	1.83	0.64	0.2	0.04	114	3.67	35.7	97.3	31.1	319	14.2	206	10.1	10.9	0.21
P428	ILD	1	58	1.016	6.5	3.5	4.9	17.1	0.6	8.1	3.1	4.5	69.8	23.5	5.4	1.3	0	3.12	1.05	0.24	0.06	0	107	3.42	32.7	95.6	31.3	327	13.1	263	10.9	12.6	0.29
P429	ILD	1	53	1.015	5.5	6.8	37.5	10.8	1	7	2	4.6	66.5	22.3	7.9	3.1	0.2	3.04	1.02	0.36	0.14	0.01	99	3.29	29.5	89.7	30.1	336	12.6	173	8.6	8.7	0.15
P430	ILD	1	43	1.015	6.5	7.1	3.7	4.9	1.3	0.7	0.9	5.3	58.1	31.8	7.6	2.3	0.2	3.08	1.68	0.4	0.12	0.01	103	4	33	82.5	25.8	312	14.8	349	9.5	10.6	0.33
P431	ILD	0	47	1.019	5	1.9	6.8	1.8	0	1	0	10.4	84.5	10.7	4.3	0.4	0.1	8.8	1.12	0.45	0.04	0.01	142	4.71	43.7	92.8	30.1	325	12.8	213	10	11.7	0.21
P432	ILD	1	52	1.021	6	48.1	9.1	8.9	9	2	2	6.6	63	27.8	7.4	1.5	0.3	4.15	1.83	0.49	0.1	0.02	102	3.63	31.5	86.8	28.1	324	12.5	284	10.3	11.9	0.29
P433	ILD	1	46	1.012	5.5	4.2	6.5	25.1	0.8	1.2	4.5	5.9	52.4	36.9	9.3	1.2	0.2	3.1	2.18	0.5	0.07	0.01	89	3.07	28.2	91.9	29	316	14.4	419	9.2	9.9	0.39
P434	ILD	1	58	1.033	6	4.9	2.8	3.6	0.9	0.5	0.6	7.2	64.8	25.4	7.3	2.4	0.1	4.65	1.82	0.52	0.17	0.01	118	4.12	37	89.8	28.6	319	14	401	9.9	11.5	0.39
P435	ILD	1	49	1.011	6	1.1	6.8	7.4	0.2	1.2	1.3	6.5	62.9	19.8	10.8	6.2	0.3	4.07	1.28	0.7	0.4	0.02	97	3.28	31.4	95.7	28.7	299	14.8	585	11.2	13	0.32
P436	ILD	1	70	1.021	6.5	15.3	6.1	10.2	2.8	1.1	1.8	6.1	71.9	20	7.2	0.7	0.2	4.42	1.23	0.44	0.04	0.01	88	3.6	28.6	79.4	24.4	308	14.8	470	8.8	9	0.41
P437	ILD	1	53	1.026	5.5	8	32.7	15.5	1	6	3	4.8	62.7	28.2	5.4	3.7	0	3.03	1.36	0.26	0.18	0	95	3.8	30.6	80.5	25	310	13.2	201	10.1	11.2	0.2
P438	ILD	1	52	1.01	5	0.9	3.5	7.1	0	1	1	9.7	33.8	60.3	5.3	0.4	0.2	3.28	5.87	0.52	0.04	0.02	108	4.57	39.2	87.2	28	422	13.8	323	11.5	14.3	0.37
P439	ILD	1	52	1.014	5.5	5	10.8	17.9	0.9	1.9	3.2	11.6	70.6	19.4	7.2	2.7	0.1	8.17	2.24	0.83	0.31	0.01	119	3.52	34.9	99.1	33.8	341	14.9	390	11.5	13.6	0.45
P440	ILD	1	52	1.012	7	3	2.6	7.2	0.5	0.5	1.3	5.6	58.7	26.8	7.8	6	0.7	3.31	1.51	0.44	0.34	0.04	120	4.29	38.3	89.3	28	313	13.9	430	12.1	15.2	0.52
P441	ILD	0	74	1.011	7.5	1.2	2.9	2.6	0.2	0.5	0.5	7.1	62.5	26.9	9.1	1.1	0.4	4.45	1.92	0.65	0.08	0.03	96	2.87	28.8	100.3	33.4	333	13.9	287	8.7	8.5	0.25
P442	ILD	1	40	1.012	5.5	0.7	1.2	0.9	0.1	0.2	0.2	5	66.6	23.4	6.8	3	0.2	3.34	1.17	0.34	0.15	0.01	111	4.01	36	89.8	27.7	308	15.5	275	9.7	10.3	0.27
P443	ILD	1	43	1.015	6.5	4.7	52	28	1	9	5	8.8	67.8	24.8	6.7	0.7	0	6	2.19	0.59	0.06	0	115	3.78	34.8	92.1	30.4	330	12	465	9.4	10	0.44
P444	ILD	1	55	1.014	7	16.7	37.2	10.4	3	7	2	11.3	80.3	16.9	2.6	0.1	0.1	9.11	1.91	0.29	0.01	0.001	107	4.12	34.1	82.8	26	314	13.9	458	10.6	12.2	0.58
P445	ILD	1	61	1.012	6.5	0.8	2.3	4.3	0.1	0.4	0.8	13.4	64.2	30.2	4.3	0.9	0.4	8.58	4.4	0.58	0.12	0.06	133	4.08	40.9	100.2	32.6	325	15.4	284	11.3	13.6	0.32
P446	ILD	1	61	1.013	6	10.2	5	1.7	2	1	0	4.3	62.2	33.4	0.9	3.3	0.2	2.64	1.42	0.04	0.14	0.01	112	3.85	34.5	89.6	29.1	325	14.9	270	9.9	10.9	0.27
P447	ILD	1	50	1.031	5.5	3.9	61.6	3.9	0.7	11.1	0.7	5.2	43.7	40.2	13.4	2.5	0.2	2.29	2.1	0.7	0.13	0.01	117	3.96	36.3	91.7	29.5	322	13.8	319	9.5	9.9	0.3
P448	ILD	1	62	1.023	6.5	15.3	8.3	16.5	2.8	1.5	3	10.7	66.6	24.2	8.5	0.3	0.4	7.1	2.58	0.9	0.03	0.04	114	3.65	35.5	97.3	31.2	321	16.4	271	10.6	12	0.29
P449	ILD	1	37	1.016	5.5	105.6	117.3	41.5	19	21.1	7.5	6.9	65.6	21	5.5	7.6	0.3	4.55	1.46	0.38	0.53	0.02	122	4.24	38	89.6	28.8	321	12.7	374	10.1	9.9	0.38
P450	ILD	1	21	1.013	6.5	4.6	111.8	8.7	0.8	20.1	1.6	10.1	59.5	31.3	6.6	2.4	0.2	5.99	3.15	0.66	0.24	0.02	123	4.27	38.2	89.5	28.8	322	12.9	343	10.4	13.1	0.36
P451	ILD	1	46	1.028	6	111.1	19.1	12.7	20	3	2	5.3	57.4	31.8	8.3	2.1	0.4	3.04	1.68	0.44	0.11	0.02	108	4.03	33.7	83.6	25.8	320	13.3	308	10.9	12.1	0.33
P452	ILD	1	40	1.02	7.5	1.1	6.8	6.7	0.2	1.2	1.2	11.4	61	30.7	7	0.9	0.4	6.93	3.49	0.79	0.1	0.05	110	3.58	33.1	93	30.9	332	12.4	334	9.4	9.9	0.31
P453	ILD	1	43	1.025	6	9.4	35.3	24.6	1.7	6.4	4.4	5	46.5	39.8	13.3	0.2	0.2	2.33	2	0.67	0.01	0.01	125	4.04	37.7	93.3	30.9	332	13.7	209	10.9	13.2	0.23
P454	ILD	1	68	1.015	6.5	9.9	33.1	3	1.8	6	0.5	9	51	41.5	5.8	1.5	0.2	4.57	3.71	0.52	0.13	0.02	144	4.6	42.7	92.8	31.3	337	13.6	225	11.4	14.2	0.26
P455	ILD	1	52	1.021	7	10.1	2.2	12.4	1.8	0.4	2.2	8.7	63.6	25.8	10.1	0.3	0.2	5.55	2.25	0.88	0.03	0.02	106	4.08	33.1	81.1	26	320	13.5	414	9.1	9.4	0.38
P456	ILD	1	56	1.015	6.5	6.3	10.9	6.5	1.1	2	1.2	5.3	62	28.7	8.3	0.6	0.4	3.29	1.52	0.44	0.03	0.02	128	4.37	38	87	29.3	337	12.5	200	10.2	12	0.2
P457	ILD	1	59	1.015	6.5	2.4	29.5	18.4	0.4	5.3	3.3	5.3	65	24.8	7.9	2.1	0.2	3.46	1.32	0.42	0.11	0.01	102	4.14	31.6	76.3	24.6	323	18	176	11.2	15.5	0.2
P458	ILD	1	38	1.016	7	15.3	3.6	1.6	2.8	0.7	0.3	5.4	71.1	21	5.8	1.9	0.2	3.83	1.13	0.31	0.1	0.01	103	3.78	32.2	85.2	27.2	320	13.5	407	9.2	9.9	0.38
P459	ILD	1	54	1.018	5	8	1169.5	58.6	1.4	210.5	10.5	9.2	52	28.1	17.2	2.4	0.3	4.79	2.59	1.58	0.22	0.03	125	4.14	38.5	93	30.2	325	13.8	439	10.2	11.2	0.45
P460	ILD	1	52	1.015	8	0.9	1.9	0.9	0.2	0.3	0.2	4.9	24.9	51.6	12.3	8.6	1.6	1.21	2.52	0.65	0.42	0.06	126	6.53	40.1	89.5	30	235	13.1	195	10.1	13	0.22
P461	ILD	1	49	1.022	6.5	15.3	35.3	26.8	2.8	6.4	4.8	7.8	75.5	19.8	4.6	0	0.1	5.87	1.54	0.36	0	0.01	121	4.2	37.6	89.5	28.8	322	13.3	347	9.6	10.4	0.33
P462	ILD	1	43	1.024	5.5	7.1	28.3	8.6	1.3	5.1	1.5	5.9	49.4	42.7	5.2	1.7	0	2.89	2.5	0.36	0.1	0	115	4.37	35.2	50.5	26.3	327	12.6	219	9.5	10.1	0.21
P463	ILD	1	53	1.011	5.5	13.6	201.8	10.3	2.4	36.3	1.9	4.3	44.8	40.4	11	3.1	0.7	1.91	1.72	0.47	0.13	0.03	129	3.93	38.5	98	32.8	335	11.9	203	11	13	0.22
P464	ILD	1	47	1.024	6	5.1	3.9	4.3	0.9	0.7	0.8	9.5	75.3	14.2	9.6	0.9	0	7.17	1.36	0.91	0.09	0	111	4.06	35.4	87.2	27	314	15.6	527	11.4	9.9	0.52
P465	ILD	0	46	1.043	6	15.3	9.3	3.4	2.8	1.7	0.6	6.6	62	30.7	5.9	1.2	0.2	4.08	2.02	0.39	0.08	0.01	151	5.24	45.9	87.6	28.8	329	12.5	196	13	17.4	0.25
P466	ILD	1	41	1.015	6	16.2	39	19	2.9	7	3.4	9.8	55.8	29.9	6.8	7	0.5	5.45	2.93	0.67	0.69	0.05	137	5.06	41.2	81.4	27.1	333	14.9	338	8.8	9.2	0.3
P467	ILD	1	57	1.012	6.5	0.5	2.2	5.4	0	0	1	6.3	74.3	19.3	5.3	1.1	0	4.65	1.21	0.33	0.07	0	138	4.42	42.3	95.7	31.2	326	13.8	178	12.3	16.1	0.22
P468	ILD	1	42	1.016	7	3.6	28.3	21.5	0.6	5.1	3.9	5.9	75.8	18.4	2.9	2.9	0	4.48	1.09	0.17	0.17	0	123	4.03	35.6	88.1	30.5	346	12	231	10.3	11.9	0.24
P469	ILD	0	44	1.026	5.5	33.7	21.9	10.9	6	4	2	5.2	55.6	31.7	10.4	2.1	0.2	2.88	1.64	0.54	0.11	0.01	121	4.49	37.9	84.4	26.9	319	15	422	10.1	11.4	0.42
P470	ILD	1	42	1.015	5.5	10.3	240.7	11.3	4.9	43.3	2	12.7	68.6	22	6.7	2.6	0.1	8.69	2.79	0.85	0.33	0.01	135	4.56	42	52.3	29.7	321	12.9	353	11	13.2	0.39
P471	ILD	0	74	1.019	6	32	4.7	1.3	5.8	0.8	0.2	6.8	60.2	26.2	8.5	4.7	0.4	4.09	1.78	0.58	0.32	0.03	98	4.08	32.4	79.4	24	302	17.6	290	8.7	8.7	0.25
P472	ILD	1	53	1.026	6	23.4	14.4	12.9	4.2	2.6	2.3	8.3	71	19.6	8.2	1.1	0.1	5.9	1.63	0.68	0.09	0.01	82	3.69	27.9	75.6	22.2	294	17.7	550	8.2	8.4	0.45
P473	ILD	1	57	1.01	7	130.3	12.8	25.1	23	2	5	5.3	70.5	23.2	4.4	1.7	0.2	3.7	1.22	0.23	0.09	0.01	79	2.62	25	95.4	30.2	316	18.1	224	10	10.9	0.22
P474	ILD	1	58	1.015	5.5	2.5	4.2	3.6	0	1	1	6.6	55.6	37.7	5.8	0.9	0	3.67	2.49	0.38	0.06	0	114	3.73	33.7	90.3	30.6	338	13.3	283	9.6	10.7	0.27
P475	ILD	1	45	1.009	6	6.3	0.5	1.6	1.1	0.1	0.3	4.6	63.7	23.5	10.2	2.2	0.4	2.95	1.09	0.47	0.1	0.02	127	4.26	39.7	93.2	29.8	320	13.9	245	12.1	14.8	0.3
P476	ILD	1	55	1.019	6.5	14.5	6.8	6	2.6	1.2	1.1	6.9	53.6	38.3	6.8	0.7	0.6	3.7	2.64	0.47	0.05	0.04	114	3.29	34.8	105.8	34.7	328	13.3	358	10.2	10.8	0.36
P477	ILD	1	60	1.006	7	0.5	0.9	0.4	0	0	0	4.6	53.3	38.4	6.6	1.5	0.2	2.44	1.76	0.3	0.07	0.01	107	3.49	31.9	91.4	30.7	335	14	198	10.2	11.3	0.2
P478	ILD	1	44	1.026	6	1.1	2.8	1.5	0.2	0.5	0.3	2.6	55	30.1	13.7	1.2	0	1.41	0.77	0.36	0.03	0	90	3.81	29.3	76.9	23.6	307	19.8	204	9	9.5	0.18
P479	ILD	1	48	1.017	5.5	6.4	9.1	8.5	1	2	2	5.1	64.8	23	10.1	2.1	0	3.32	1.18	0.52	0.11	0	103	3.51	31.3	89.2	29.3	329	11.9	370	9.8	11	0.36
P480	ILD	1	46	1.008	6	1.5	16	3.6	0	3	1	4.5	78.6	9.6	9.6	2	0.2	3.54	0.43	0.43	0.09	0.01	90	3.1	28.4	91.6	29	317	13.7	212	9.8	10.2	0.21
P481	ILD	1	59	1.014	7	8.6	4.3	1.5	2	1	0	4.5	66.3	28.2	5.3	0.2	0	3.01	1.28	0.24	0.01	0	125	4.3	38.2	88.8	29.1	327	12.9	348	10	11.2	0.35
P482	ILD	1	44	1.015	7	8.7	9.1	12.7	1.6	1.6	2.3	12.1	74.6	17.4	7.2	0.6	0.2	9.02	2.11	0.87	0.07	0.03	110	3.87	35.2	91	28.4	313	13.1	476	8.6	8.5	0.41
P483	ILD	1	66	1.023	6.5	45.3	6.8	18.4	8.2	1.2	3.3	5.6	82.2	12.1	5.7	0	0	4.51	0.68	0.32	0	0	116	3.65	36.1	98.9	31.8	321	14.5	158	11.2	13.3	0.18
P484	ILD	1	60	1.008	6	2.3	0.7	0.7	0.4	0.1	0.1	5.3	42.4	49.7	6.2	1.3	0.4	2.26	2.65	0.33	0.07	0.02	111	3.97	35.5	89.4	28	313	12.5	248	11	12.7	0.27
P485	ILD	1	43	1.025	6.5	27.5	25.9	8.7	5	4.7	1.6	6.9	67.1	20.1	10.3	2.2	0.3	4.61	1.38	0.71	0.15	0.02	111	3.96	34.6	87.4	28	321	12.9	421	9.6	10.5	0.41
P486	ILD	1	61	1.024	5.5	15.3	190	10.8	3	34	2	6.6	59.5	26.2	6.3	7.7	0.3	3.94	1.74	0.42	0.51	0.02	119	4.4	37.8	85.9	27	315	12.9	181	9.7	11.2	0.18
P487	ILD	1	57	1.023	6	33.9	21.4	40.6	6	4	7	9.6	69.1	20.9	4.5	5.1	0.4	6.6	2	0.4	0.5	0	132	4.09	40.4	98.9	32.3	327	12.4	292	8.7	16.6	0.254
P488	ILD	1	61	1.021	5.5	7.5	5	10.7	1.4	0.9	1.9	7.6	65.6	25.6	7.5	0.8	0.5	5	1.9	0.6	0.1	0	123	4.37	38	87	28.1	323	14.5	238	9.3	16.7	0.22
P489	ILD	1	56	1.036	5.5	13.2	32.5	33.7	2	6	6	7.4	60.9	30.9	7.2	0.8	0.2	4.5	2.3	0.5	0.1	0	122	3.99	38.1	95.3	30.6	321	13.5	209	8.9	16.3	0.186
P490	ILD	1	50	1.012	6.5	10.7	72.4	28.3	1.9	13	5.1	12.1	61.6	24	5.9	8	0.5	7.4	2.9	0.7	1	0.1	119	4.07	36.7	90.2	29.1	323	13.9	424	7.9	16.5	0.335
P491	ILD	1	48	1.024	5.5	4.2	5.5	2.4	0.8	1	0.4	4.4	54.8	34.2	7.8	2.6	0.6	2.4	1.5	0.3	0.1	0	125	4.02	37.5	93.2	31.1	334	12.3	229	8.9	16.4	0.203
P492	ILD	1	61	1.015	5.5	25.9	6.2	5.5	4.7	1.1	1	10.5	64.3	25.8	8.7	0.7	0.5	6.8	2.7	0.9	0.1	0	130	3.64	37.9	104.1	35.7	343	14.6	147	7.6	16.5	0.111
P493	ILD	1	60	1.025	5.5	15.3	358.6	3.4	2.8	64.5	0.6	13.1	82.6	13.9	2.9	0.4	0.2	10.9	1.8	0.4	0.1	0	113	3.85	35.2	91.6	29.3	319	14.5	480	7.6	16.4	0.362
P494	ILD	1	54	1.021	7	12.1	6.1	3.5	2.2	1.1	0.6	9	73.4	18.9	5.9	1.3	0.5	6.6	1.7	0.5	0.1	0	113	3.72	34.7	93.2	30.3	325	13.2	307	7	16.9	0.216
P495	ILD	1	60	1.025	5.5	14.1	64.5	59.8	2.5	11.6	10.8	3.4	72.5	18.2	6.9	2.2	0.2	2.4	0.6	0.2	0.1	0	89	2.74	27.3	99.5	32.7	328	14.1	232	8.1	16.7	0.186
P496	ILD	1	65	1.017	8	15.3	5.1	4.7	2.8	0.9	0.8	10	87.2	8.7	3.6	0.2	0.3	8.7	0.9	0.4	0	0	85	3.62	27.4	75.8	23.5	310	18.7	438	6.6	16.4	0.286
P497	ILD	1	47	1.019	6.5	2.9	2.5	5.3	0.5	0.5	1	6.2	61	29.8	7.3	1.3	0.6	3.8	1.9	0.5	0.1	0	128	4.36	38.9	89.2	29.3	328	14.4	377	7	17.2	0.264
P498	ILD	1	39	1.048	6	13.2	221.9	206.2	2.4	39.9	37.1	11.2	77.4	16.8	5	0.5	0.3	8.7	1.9	0.6	0.1	0	128	4.44	40.3	90.8	28.7	316	14.7	451	7.5	15.9	0.337
P499	ILD	1	52	1.015	5.5	17.7	38.6	67	3.2	6.9	12.1	9.9	61	32.7	5.2	0.8	0.3	6	3.2	0.5	0.1	0	131	4.02	40.4	100.5	32.5	323	13	315	8.6	16.1	0.269
P500	ILD	0	56	1.023	6.5	7.5	2.4	0.2	1	0	0	9.3	67.5	20.8	9.9	0.4	1.4	6.3	1.9	0.9	0	0.1	136	4.57	44.3	97	9	308	13.9	534	8	16.8	0.427
P501	ILD	1	47	1.029	5.5	18.7	318.3	21	3.4	57.3	3.8	7.7	75.3	18.9	4.8	0.5	0.5	5.8	1.4	0.4	0	0	118	4.11	36.8	89.5	28.7	321	16.6	380	7.5	16.3	0.285
P502	ILD	1	63	1.016	5.5	12.9	71.7	8.8	2.3	12.9	1.6	5.3	59.9	31.3	7.2	0.9	0.7	3.2	1.7	0.4	0	0	119	4.02	36.6	91	29.5	325	12.5	192	7.1	17.3	0.135
P503	ILD	1	52	1.017	5.6	17.4	12.3	29.7	3.1	2.2	5.4	1.2	74.7	16.9	6.3	1.6	0.5	5.3	1.2	0.5	0.1	0	139	4.7	41.3	96.7	32.6	337	13.4	279	8.6	16.4	0.24
P504	ILD	1	52	1.014	7	9.4	5.2	3.8	1.7	0.9	0.7	8.9	80.1	12.9	6.5	0.2	0.3	7.2	1.2	0.6	0	0	119	4.4	37.6	85.5	27	315	14.1	377	7.4	16.5	0.277
P505	ILD	1	53	1.006	6.5	6.8	6.2	1.4	1	1	0	8.9	57.2	31.9	6.1	4.3	0.5	5.1	2.9	0.5	0.4	0	141	4.76	44.7	93.9	29.6	315	13.2	292	8.6	16.1	0.252
P506	ILD	0	61	1.017	7	30.7	3.7	2.2	5.5	0.7	0.4	7.1	67.5	23.9	6.4	1.8	0.4	4.8	1.7	0.5	0.1	0	104	3.55	32.4	91.4	29.3	321	14.4	297	8.5	16.6	0.252
P507	ILD	1	60	1.023	5	3.8	437.7	23	0.7	78.8	4.1	3.6	56	31.2	8.7	4.1	0	2.1	1.1	0.3	0.1	0	114	3.84	34.5	90.1	29.8	331	13.8	156	8.9	18.2	0.138
P508	ILD	1	50	1.004	6.5	1.4	6.7	1.4	0	1	0	13.7	80.5	9.5	6.1	3.4	0.5	11	1.3	0.8	0.5	0.1	127	4.31	40.1	93	29.5	317	14.2	460	7.2	16.2	0.333
P509	ILD	1	62	1.017	6.5	83.3	4.5	5.8	15	0.8	1	8	62.5	30.6	5.8	0.8	0.3	5	2.4	0.5	0.1	0	133	4.44	40.9	92.2	29.9	325	12.6	171	8.2	16.5	0.141
P510	ILD	0	25	1.025	6.5	14.4	7.1	3.2	2.6	1.3	0.6	8	73.5	20.9	5	0.2	0.4	5.9	1.7	0.4	0	0	143	4.36	43.4	99.6	32.8	329	13	183	9.5	16.4	0.173
P511	ILD	1	58	1.013	6.5	8.9	599.8	55.5	2	108	10	5.8	63.4	24	12.1	0.3	0.2	3.67	1.39	0.7	0.02	0.01	132	4.62	41.3	89.4	28.6	320	12.7	260	8.8	9.1	0.23
P512	ILD	1	47	1.011	6.5	6.8	18.6	8.2	1.2	3.3	1.5	5.7	69	23.2	6.5	1.1	0.2	3.93	1.32	0.37	0.06	0.01	124	3.83	38	99.2	32.4	326	12.6	301	10.4	11.7	0.31
P513	ILD	0	68	1.016	6	13	10.5	4.3	2	2	1	6	68.9	20.3	5.2	5.4	0.2	4.1	1.21	0.31	0.32	0.01	119	4.23	38	89.8	28.1	313	15.5	283	10.7	11.8	0.3
P514	ILD	1	58	1.015	5.5	8.5	2644.6	1.4	1.5	476	0.3	4.4	51.9	37.3	5.5	4.8	0.5	2.29	1.64	0.24	0.21	0.02	124	4.17	37.7	91.7	30.2	329	12.9	178	9.6	10.4	0.17
P515	ILD	1	64	1.019	6	1.3	6.4	12.7	0	1	2	6	68.5	27	4.3	0.2	0	4.14	1.63	0.26	0.01	0	119	4.01	36.1	90	29.7	330	15.2	282	8.8	9	0.25
P516	ILD	1	66	1.012	5.5	4	31.3	3.9	0.7	5.6	0.7	8.8	63.2	29.6	5.3	1.6	0.3	5.56	2.61	0.47	0.14	0.03	129	3.99	40	100.3	32.3	323	12.9	143	12.8	16.9	0.18
P517	ILD	1	40	1.029	6	9.8	55.5	44.6	1.8	10	8	6	61.5	25.1	7.1	6	0.3	3.7	1.51	0.43	0.36	0.2	109	4	33.5	83.8	27.3	325	14.7	220	11.6	14.6	0.25
P518	ILD	0	59	1.014	7	3.1	2.1	1.3	1	0	0	8.8	59.4	31.5	8.1	1	0	5.21	2.76	0.71	0.09	0	117	4.02	36.4	90.5	29.1	321	15.2	282	10.2	11.1	0.29
P519	ILD	1	47	1.021	5	24	1875.9	23.1	4.3	337.7	4.2	4.7	54.6	33.6	9.5	2.3	0	2.58	1.59	0.45	0.11	0	97	3.49	30.6	97.7	27.8	317	13	366	9.5	10.3	0.35
P520	ILD	0	51	1.015	7	17.1	15	8.6	3	3	2	10.6	78.6	15.3	5.5	0.5	0.1	8.33	1.62	0.58	0.05	0.01	114	3.89	35.5	91.3	29.3	321	13.2	409	9.7	10.9	0.4
P521	ILD	1	53	1.02	6	38	146.2	30.4	6.8	26.3	5.5	8	64.7	22.5	11.2	1.5	0.1	5.14	1.79	0.89	0.12	0.01	95	3.57	29.7	83.2	26.6	320	15.3	470	10.6	12.5	0.5
P522	ILD	1	53	1.007	5.5	0.8	2.3	0.2	0.1	0.4	0	5.2	58.6	34.5	4.4	2.1	0.4	3.06	1.8	0.23	0.11	0.02	144	4.73	41	86.7	30.4	351	12.3	211	10.7	12.5	0.23
P523	ILD	1	50	1.017	6	7.5	33.8	8.6	1.4	6.1	1.5	5.5	61.3	30	8	0.5	0.2	3.35	1.64	0.44	0.03	0.01	99	3.43	29.9	87.2	28.9	331	13.7	261	10	10.8	0.26
P524	ILD	1	46	1.023	5.5	8.9	22.1	9.8	1.6	4	1.8	4.4	61.6	30.6	6.2	1.6	0	2.7	1.34	0.27	0.07	0	106	3.62	32.2	89	29.3	329	13.3	302	9.9	10.7	0.3
P525	ILD	1	67	1.014	6.5	11.5	36.7	6	2	7	1	8.1	75.7	21.2	3	0	0.1	6.1	1.71	0.24	0	0.01	122	3.78	37.4	98.9	32.3	326	13.4	290	11.6	14.3	0.34
P526	ILD	1	41	1.015	6.5	15.3	77.7	21.6	2.8	14	3.9	6.9	74.1	17	7.3	1.2	0.4	3.75	0.86	0.37	0.06	0.02	98	3.69	30.1	81.6	26.6	326	12.3	256	9.4	9.7	0.24
P527	ILD	1	66	1.025	6	23.9	11.5	4.8	4.3	2.1	0.9	7.7	69.3	21.9	7.6	0.7	0.5	5.3	1.7	0.6	0.1	0	122	4.05	38	93.8	30.1	320	14.8	312	8.6	15.9	0.267
P528	ILD	1	59	1.014	6	1	0.2	0.5	0.2	0	0.1	8.5	63.4	25.7	7.5	3.2	0.2	5.37	2.18	0.64	0.27	0.02	126	4.33	38.4	88.7	29.1	328	14.4	366	9.2	9.8	0.34
P529	ILD	1	76	1.023	7	4.9	1	2	0.9	0.2	0.4	9.2	71.7	15.4	11.7	1	0.2	6.6	1.42	1.08	0.09	0.02	110	3.65	33.8	92.6	30.1	325	12.4	330	10	11	0.33
P530	ILD	1	60	1.025	6	4.3	62.4	33.1	1	11	6	9	62	30.8	5.7	1.3	0.1	5.55	2.76	0.51	0.12	0.01	127	4.16	38.3	92.1	30.5	332	14.2	191	11.6	14	0.22
P531	ILD	1	61	1.017	6.5	1.2	1.6	0.5	0	0	0	5.2	61.11	30.8	5.6	2.3	0.2	3.18	1.6	0.29	0.12	0.01	110	4.04	36.9	91.3	28.7	314	13.2	215	10.1	11.4	0.22
P532	ILD	1	57	1.019	6	5.2	31.3	10.6	0.9	5.6	1.9	5.6	57.2	27.5	8.7	6.4	0.2	3.22	1.55	0.49	0.36	0.01	119	3.525	34.9	99.1	33.8	341	15.9	249	9.6	10.2	0.24
P533	ILD	1	48	1.026	6.5	6	65.3	52.7	1.1	11.8	9.5	6.9	66.2	21.3	8.2	4.2	0.1	4.55	1.46	0.56	0.29	0.01	80	4.57	27.3	59.7	17.5	293	19.3	335	10	12.2	0.3
P534	PF	1	52	1.015	6.5	7.8	2.3	1.5	1	0	0	4.4	49.6	38.3	8.7	2.7	0.7	2.17	1.68	0.38	0.12	0.03	116	3.8	35.4	93.3	30.6	328	10.1	266	7.8	12.3	0.208
P535	PF	1	68	1.009	6	1.4	7.4	8.8	0	1	2	9.2	67.9	26.8	3.2	1.4	0.7	6.21	2.45	0.29	0.13	0.06	110	3.71	34.9	94.1	29.7	316	10.3	315	6.8	10	0.214
P536	PF	1	57	1.02	7.5	14.9	32.7	13.5	3	6	2	9.4	62.7	27.4	6.9	1.9	1.1	5.86	2.56	0.65	0.18	0.1	122	4.13	38.5	93.1	29.4	316	10.3	197	8.2	14.3	0.161
P537	PF	1	63	1.012	6.5	6.5	10.6	3.9	1	2	1	7.6	56.7	31.9	7.7	2.9	0.8	4.29	2.41	0.58	0.22	0.06	94	3.58	29.7	82.9	26.2	316	10.5	550	6.4	8.5	0.352
P538	PF	0	71	1.019	6.5	7.6	8.7	6.3	1	2	1	11.6	68.1	20.9	8.8	0.9	13	7.87	2.41	1.02	0.1	0.15	129	4.11	39.3	95.6	31.4	328	10.5	221	7.9	13	0.175
P539	PF	0	65	1.026	7	2.4	1.3	2	0	0	0	8.8	75.3	19.3	4	0.7	0.7	6.65	1.7	0.35	0.06	0.06	134	4.79	41.8	87.2	28	321	10.6	264	8.1	13.3	0.213
P540	PF	1	67	1.01	6	5.3	15.5	13.4	1	3	2	4	73.6	19.2	3.7	3.2	0.3	2.96	0.77	0.15	0.13	0.01	87	3.23	26.9	83.3	26.9	322	12	219	7.9	13.3	0.174
P541	PF	0	54	1.018	6.5	14.1	1.6	1.4	3	0	0	8.1	64.2	26.4	7.8	1.7	0.2	5.21	2.12	0.63	0.14	0.02	161	5	48.5	97	32.2	332	12.4	309	8.7	9.7	0.27
P542	PF	1	56	1.006	6	1.1	1.4	3.7	0	0	1	5	59.4	30.1	4.6	5.7	0.2	2.94	1.49	0.23	0.28	0.01	118	4.47	36.9	82.6	26.4	320	12.8	374	9.8	11.4	0.37
P543	PF	1	49	1.011	7.5	3.8	5.2	5.3	1	1	1	4.9	48.8	44.7	4.7	1.6	0.2	2.38	2.18	0.23	0.08	0.01	92	3	28.6	95.3	30.7	322	12.9	201	10.5	12	0.21
P544	PF	1	65	1.012	5.5	17	18.2	4.9	3	3	1	5.2	63.9	30.5	5.2	0.4	0	3.35	1.6	0.27	0.02	0	100	3.48	31.5	90.5	28.7	317	13.2	162	10.7	12.4	0.17
P545	PF	1	65	1.012	7	2.4	31.1	13.9	0	6	3	6.4	51.7	31.7	10.9	3.1	0.6	3.46	2.04	0.7	0.2	0.04	113	3.41	35.3	103.5	33.1	320	15.1	141	10.1	10.9	0.14
P546	PF	1	47	1.023	6.5	87	10.7	23	16	2	4	9.7	76.7	13.5	8.2	1.4	0.2	7.43	1.31	0.79	0.14	0.02	117	3.98	35	87.9	29.4	334	13.4	381	9.5	10.2	0.36
P547	PF	1	50	1.017	6	5.4	8.4	8.9	1	2	2	8.8	61	18.7	3.2	17	0.1	5.37	1.64	0.28	1.49	0.01	97	3.6	30.4	84.4	26.9	319	13.7	317	9.6	10.7	0.31
P548	PF	1	63	1.008	6.5	4.5	39.1	2.2	1	7	0	9.1	87.7	8.7	3.3	0.1	0.2	7.94	0.79	0.3	0.01	0.02	117	3.87	35.9	92.8	30.2	326	14.5	260	9	9.4	0.23
P549	PF	1	50	1.008	7.5	2.5	0.9	2.2	0	0	0	7.1	74.9	20.7	3.8	0.6	0	5.3	1.46	0.27	0.04	0	104	3.8	33.2	87.4	27.4	313	14.9	316	10.3	11.4	0.33
P550	PF	1	49	1.014	5.5	4.2	1.5	1.6	1	0	0	11.1	61.2	33.2	4.6	0.8	0.2	6.78	3.67	0.51	0.09	0.02	101	3.6	32.2	89.4	28.1	314	15.2	570	9.2	9.1	0.52
P551	PF	0	59	1.016	6	2.4	18.4	15.7	0	3	3	7.7	66.8	29.1	3.5	0.5	0.1	5.16	2.25	0.27	0.04	0.01	125	4.12	39.4	95.6	30.3	317	15.2	303	9.7	10.3	0.29
P552	PF	1	61	1.019	6.5	18	49.6	56.8	3	9	10	7	69.4	21.4	8.8	0.3	0.1	4.88	1.51	0.62	0.02	0.01	124	4.56	36.4	79.8	27.2	341	15.5	326	11.4	14.4	0.37
P553	PF	0	69	1.02	6.5	15.7	6	16.4	3	1	3	8.7	67	24.4	5.9	2.6	0.1	5.85	2.13	0.52	0.23	0.01	97	3.53	30.2	85.6	27.5	321	15.7	295	8.7	8.9	0.26
P554	PF	1	69	1.007	6.5	2.6	248.4	1.5	0	45	0	10.1	83.4	13.5	2.9	0.1	0.1	8.39	1.36	0.29	0.01	0.01	98	3.77	31	82.2	26	316	15.8	374	9.6	10.3	0.36
P555	PF	1	74	1.011	6	18.8	24.8	1.9	3	4	0	8.3	71.3	22.6	4.5	1.5	0.1	5.9	1.87	0.37	0.12	0.01	93	3.53	29.7	84.1	26.3	313	16	258	10.4	11.4	0.27
P556	PF	1	63	1.029	5.5	2.3	33.5	20.6	0	6	4	9.9	56.9	29.7	6.8	5.7	0.9	5.64	2.94	0.67	0.56	0.09	111	3.64	34	93.3	30.6	328	9	370	6.9	10	0.256
P557	PF	0	65	1.013	5	1.2	1.6	0.7	0.2	0.3	0.1	9.9	52.9	39	7.9	0.1	0.1	5.25	3.86	0.78	0.01	0.01	92	3.52	29.3	83.2	26.1	314	17.2	551	9.4	9.8	0.52
P558	PF	1	36	1.023	6	48.7	3.8	3.6	8.8	0.7	0.6	6.2	62.7	29.4	4.8	2.6	0.5	3.9	1.83	0.3	0.16	0.03	95	3.85	31.5	81.8	24.7	302	16.2	598	8.9	8.8	0.53
P559	PF	1	63	1.006	6.5	6.7	12.9	3.3	1	2	1	7.4	58	30.6	7.1	4.2	0.1	4.27	2.25	0.52	0.31	0.01	115	3.92	35.9	91.6	29.3	320	14.4	387	10.4	11.6	0.4
P560	PF	1	71	1.015	5	3.9	231	4.9	1	42	1	20.8	54	27.5	4.5	3.8	0.2	13.31	5.71	0.94	0.79	0.05	90	3.04	28.1	92.4	29.6	320	17.7	450	10.2	11.8	0.46
P561	PF	1	66	1.015	6	14.7	140	0.1	2.7	25.2	0	9.6	13	17.1	6	0.2	0.1	7.33	1.64	0.57	0.02	0.01	125	4.55	38.3	84.2	27.5	326	13.5	275	11.1	13.4	0.3
P562	PF	1	45	1.01	6.5	3	6.5	23.1	0.5	1.2	4.2	7.6	41.2	42.9	13.2	2.4	0.3	3.11	3.24	1	0.18	0.02	110	4.02	34.8	86.6	27.4	316	19.2	317	9.8	11.1	0.31
P563	PF	1	63	1.012	7	1.8	6.8	2.2	0.3	1.2	0.4	4.2	57.4	32.5	7.5	2.6	0	2.43	1.38	0.32	0.11	0	112	3.67	33.6	91.6	30.5	333	12.1	145	10.8	12.8	0.16
P564	PF	1	66	1.016	7.5	1.6	0.1	0.9	0.3	0	0.2	10.7	69.7	21.3	8.3	0.7	0	7.49	2.29	0.89	0.07	0	106	3.56	31.9	89.6	29.8	332	13.5	184	11.1	12.6	0.2
P565	PF	1	55	1.014	6	15.5	10.8	7.7	2.8	1.9	1.4	9.7	51.8	41	6.7	0.1	0.4	5.01	3.96	0.65	0.01	0.04	121	4.04	36.7	90.8	30	330	14.1	244	10.9	12.3	0.27
P566	PF	1	59	1.015	7	6.5	3.6	6	1.2	0.7	1.1	6.4	50.9	30.3	14.9	3.6	0.3	3.24	1.93	0.95	0.23	0.02	99	3.27	30.9	94.5	30.3	320	12.6	528	9.3	9.8	0.49
P567	PF	1	72	1.011	7.5	4	21.3	8.9	1	4	2	13.5	73.9	19.3	3	3.6	0.2	9.99	2.61	0.4	0.49	0.03	107	3.53	32.6	92.4	30.3	328	15.7	319	8.6	8.6	0.27
P568	PF	1	56	1.013	6	1.2	1.3	2	0.2	0.2	0.4	9.5	51.3	31.8	7.2	2.7	0.4	4.87	3.65	0.68	0.26	0.04	112	4.2	35.2	83.8	26.7	318	17.2	495	10.1	11.1	0.5
P569	PF	1	72	1.008	6.5	1.2	1.2	0.7	0	0	0	6.8	54.3	36.5	6.3	2.6	0.3	3.7	2.49	0.43	0.18	0.02	110	3.53	33.1	93.8	31.2	332	12.5	213	10.5	12.2	0.22
P570	PF	0	64	1.018	6.5	1.4	1.8	2.3	0.3	0.3	0.4	11.3	59.2	31.6	7.9	1	0.3	6.66	3.56	0.89	0.11	0.03	130	4.45	39.1	87.9	29.2	332	12.8	338	9.5	10.4	0.32
P571	PF	1	41	1.029	5	15.3	7.5	3.7	2.8	1.4	0.7	7.6	68.2	21.4	8.3	1.7	0.4	5.15	1.62	0.63	0.13	0.03	129	4.01	38.8	96.8	32.2	332	12.7	191	12	13.8	0.23
P572	PF	1	61	1.025	6.5	36.3	53.1	30.4	6.5	9.6	5.5	17	74.2	21.7	3.8	0.2	0.1	12.65	3.69	0.64	0.04	0.01	118	4.39	37	84.3	26.9	319	17.7	376	9.4	10.1	0.35
P573	PF	0	55	1.026	6	11.4	54.6	7	2	10	1	11.6	72.1	25.2	2.3	0.3	0.1	8.39	2.93	0.27	0.04	0.01	111	3.76	33.2	88.3	29.5	334	13.6	413	9.7	10.2	0.4
P574	PF	0	78	1.006	7	0.8	0.5	0.9	0.1	0.1	0.2	12.7	59.3	27.4	8.8	4.1	0.4	7.5	3.47	1.11	0.52	0.05	124	4.17	38.2	91.6	29.7	325	13.4	347	10	11.3	0.35
P575	PF	1	66	1.016	6.5	29.6	2.9	4.9	5	1	1	8	78.9	15	5.2	0.9	0	6.32	1.2	0.42	0.07	0	107	3.73	32.9	88.2	28.7	325	14.3	328	9.8	11.6	0.32
P576	PF	0	64	1.028	6.5	6.2	4.4	5.9	1.1	0.8	1.1	5.4	88.1	8	3.9	0	0	4.73	0.43	0.21	0	0	94	2.59	29.1	112.41	36.3	323	15	165	9.9	10.8	0.16
P577	PF	1	64	1.015	5.5	1.8	43.3	2.5	0.3	7.8	0.5	9.5	62.7	24.7	8.5	3.9	0.2	5.97	2.35	0.81	0.37	0.02	107	3.68	33.1	89.9	29.1	323	13.6	238	10.4	11.6	0.25
P578	PF	1	46	1.014	6.5	0.5	4.1	1.6	0.1	0.7	0.3	4.4	50.9	39.6	6.8	2.5	0.2	2.26	1.76	0.3	0.11	0.01	101	3.81	31.6	82.9	26.5	320	12.7	202	11.5	14.4	0.23
P579	PF	0	77	1.017	6	2.1	3.8	1.3	0.4	0.7	0.2	7.8	70.2	17.8	8.8	2.9	0.3	5.48	1.39	0.69	0.23	0.02	113	4.1	34.9	85.1	27.6	324	14	304	9.6	10.1	0.29
P580	PF	1	74	1.016	6.5	9.4	4.9	7.8	1.7	0.9	14	2.9	76.3	12.4	10.3	1	0	2.22	0.36	0.3	0.03	0	77	2.99	24.8	82.9	25.8	310	16.1	109	9.6	11.2	0.11
P581	PF	1	57	1.018	6.5	3.2	35.9	3.6	0.6	6.5	1	11.3	72.8	17.3	6.2	3.4	0.3	8.24	1.96	0.7	0.39	0.03	116	3.94	36.8	93.4	29.4	315	13.6	282	11.8	14.4	0.33
P582	PF	1	47	1.012	5	2.4	25.3	1.5	0.4	6.4	0.3	3.9	59	33.2	6.2	1.3	0.3	2.28	1.28	0.24	0.05	0.01	129	4.11	40	97.3	31.4	323	13.4	206	10.7	12.3	0.22
P583	PF	0	61	1.022	5.5	12.8	1.8	1.8	2	0	0	9	50.5	33.2	14	2	0.3	4.52	2.97	1.25	0.18	0.03	122	3.61	36	99.7	33.8	339	12.9	330	9.1	9.7	0.3
P584	PF	1	49	1.02	6.5	9.8	7.4	5.1	2	1	1	11.3	76	16.5	6.9	0.4	0.2	8.61	1.87	0.78	0.05	0.02	126	3.7	36.8	99.5	34.1	342	11.8	238	11.5	14.8	0.27
P585	PF	1	51	1.014	7	10.6	13.7	108.1	1.9	13.3	19.5	9.2	17.2	17.7	5.1	0	0	7.08	1.62	0.47	0	0	89	3.32	30.2	91	26.8	295	14.4	604	9	9.9	0.55
P586	PF	1	44	1.013	6.5	9.4	12.3	54.8	1.7	2.2	9.9	5.2	67.2	22	6.2	4.4	0.2	3.48	1.14	0.32	0.23	0.01	123	4.17	37	88.7	29.5	332	13.8	325	10.5	11.9	0.34
P587	PF	1	48	1.029	6	7.8	232.4	235.5	1.4	41.8	42.4	9.9	87.7	7.8	3.6	0.7	0.2	8.66	0.77	0.36	0.07	0.02	101	3.91	31.7	81.1	25.8	319	17.2	375	10.2	11.6	0.38
P588	PF	1	35	1.016	6	14.1	147.3	23.5	3	27	4	4.5	51.3	37.1	9.9	1.5	0.2	2.32	1.68	0.45	0.07	0.01	86	3.85	28	72.7	22.3	307	17.2	460	9.3	10	0.43
P589	PF	1	51	1.008	5.5	32.2	49.2	23.5	6	9	4	8.4	67.2	24	8.1	0.6	0.1	5.61	2	0.68	0.05	0.01	100	3.47	32.3	93.1	28.8	310	12.4	399	9.1	9.2	0.36
P590	PF	1	34	1.011	5	9.5	3.9	1.5	2	1	0	5.6	66.5	22.7	9.5	1.1	0.2	3.7	1.26	0.53	0.06	0.01	101	3.78	31.2	82.5	26.7	324	14.3	240	10.4	11.7	0.25
P591	PF	0	76	1.008	6.5	0.6	1	0.5	0	0	0	3.7	54.6	31.4	8.6	5.1	0.3	2.04	1.17	0.32	0.19	0.01	136	4.51	40.3	89.4	30.2	337	13.5	152	11.1	13.8	0.17
P592	PF	0	73	1.006	5	5.8	3	2.2	1	1	0	8.8	69.3	21.4	8.2	0.9	0.2	6.06	1.87	0.72	0.08	0.02	136	4.32	40.7	94.2	31.5	334	14	339	10.3	12.2	0.35
P593	PF	0	60	1.01	5.5	0.7	3.9	1.5	0	1	0	6.5	69.8	21.4	7.7	1.1	0	4.54	1.39	0.5	0.07	0	75	2.67	24.2	90.6	28.1	310	15.5	348	8.5	8.2	0.3
P594	PF	1	66	1.013	5.5	109.5	10.1	2.7	19.7	1.8	0.5	7.3	70.6	20.5	7.1	1.8	0	5.17	1.5	0.52	0.13	0	115	3.6	34	94.4	31.9	338	13.3	465	9.7	10.4	0.45
P595	PF	1	74	1.013	7	5.4	2.7	0.4	1	0.5	0.1	6.4	72.1	20.9	5.4	1.3	0.3	4.58	1.33	0.34	0.08	0.02	123	4.13	38.3	92.7	29.8	321	13.8	163	11.2	13.7	0.18
P596	PF	1	72	1.013	6.5	15.3	625.3	2.3	2.8	112.6	0.4	3.5	63.4	24.1	10.7	1.2	0.6	2.19	0.83	0.37	0.04	0.02	99	3.68	29.4	79.9	26.9	337	15.1	270	9.7	10.5	0.26
P597	PF	1	72	1.017	7	6.8	30.4	6.7	1.2	5.5	1.2	4.9	63.3	17	13.8	5.3	0.6	3.12	0.84	0.68	0.26	0.03	86	3	27.8	92.7	28.7	309	17	284	9.6	10	0.27
P598	PF	1	38	1.023	6	1.6	1.5	7.1	0.3	0.3	1.3	4.2	60.8	19.7	15.6	2.9	1	2.53	0.82	0.65	0.12	0.04	101	3.17	30.5	96.2	31.9	331	11.8	155	10.8	12.5	0.17
P599	PF	1	42	1.025	6	3.9	7.8	13.1	1	1	2	4.3	31.9	49.5	14.4	4	0.2	1.37	2.13	0.62	0.17	0.01	127	4.31	39.6	91.9	29.5	321	12.4	223	11.1	12.7	0.25
P600	PF	1	57	1.013	7	17.8	43.7	16.7	3	8	3	4.5	33.3	57.1	7.1	1.8	0.7	1.51	2.58	0.32	0.08	0.03	99	3.82	32.8	85.9	25.9	302	15.4	357	10	11.5	0.36
P601	PF	1	68	1.009	5.5	6.3	14.3	3.5	1.1	2.6	0.6	4	71.4	18.5	7.5	2.3	0.3	2.85	0.74	0.3	0.09	0.01	78	2.93	25.8	88.1	26.6	302	17	199	9.3	9.6	0.19
P602	PF	0	72	1.015	7	11.7	8.8	14.8	2	2	3	6.7	70.6	25.4	2.4	1.6	0	4.72	1.7	0.16	0.11	0	98	3.43	31.8	92.7	28.6	308	14.6	461	9.6	10.6	0.44
P603	PF	1	60	1.017	7	5	170.7	1.1	1	31	0	6.5	42.9	45.9	6.7	4.3	0.2	2.77	2.96	0.43	0.28	0.01	122	3.76	36.7	97.6	32.4	332	13.8	275	10.6	11.5	0.29
P604	PF	1	43	1.031	5	80	0.2	0.1	14.4	0	0	15.6	59.5	33.5	5.7	0.9	0.4	9.28	5.21	0.88	0.14	0.06	123	4.12	36.1	87.6	29.9	341	12.5	209	10.2	12	0.21
P605	PF	1	45	1.021	6.9	14.1	7.1	7.5	2.5	1.3	1.4	5	66.8	28.6	3.6	1	0	3.31	1.42	0.18	0.05	0	109	3.69	32.9	89.2	29.5	331	14.2	322	9.9	11	0.32
P606	PF	1	61	1.011	6.5	5.7	4.2	4.7	1	1	1	3.9	33.2	51.5	113.7	1.3	0.3	1.31	2.03	0.54	0.05	0.01	81	2.95	26.2	88.8	27.5	309	16.7	316	8.9	8.8	0.28
P607	PF	1	53	1.016	6.5	8.8	40.8	50.1	1.6	7.3	9	9.1	65.1	28.8	5.4	0.4	0.3	6	2.6	0.5	0	0	135	4.32	42.1	97.5	31.2	320	12.9	328	8.2	15.8	0.268
P608	PF	1	56	1.027	7.5	7.4	5.8	1.7	1.3	1	0.3	11.8	68.3	23.9	6.1	1.3	0.4	8.1	2.8	0.7	0.2	0	133	4.41	40.9	92.7	30.1	325	15.9	63	9.3	17.8	0.049
P609	PF	1	68	1.014	6	144	6.8	1	25.9	1.2	0.2	5	77.4	15	5.9	1.4	0.3	3.9	0.8	0.3	0.1	0	112	3.75	34.5	91.8	29.8	324	13.6	258	7.6	16.6	0.197
P610	PF	1	57	1.03	5	1.1	0.8	2.8	0.2	0.1	0.5	4.6	53.6	36.6	8.4	1.1	0.3	2.5	1.7	0.4	0.1	0	111	3.93	34.4	87.6	28.4	324	15	291	8.3	16.3	0.24
P611	PF	1	66	1.027	6	447.9	97.8	153	81	18	28	7.7	70.8	20.9	6.6	1.1	0.6	5.4	1.6	0.5	0.1	0	115	3.93	35.6	90.6	29.3	323	12.8	245	8.1	16.2	0.198
P612	PF	1	47	1.032	5	13.2	14.4	61.4	2	3	11	4.6	51.4	34.7	12.1	1.1	0.7	2.3	1.6	0.6	0.1	0	113	4.48	35.9	80.1	24.9	311	22.8	256	9	17	0.229
P613	PF	1	42	1.024	6.5	4.8	4.5	26.6	0.9	0.8	4.8	7.2	63.7	28.5	6.9	0.6	0.3	4.6	2	0.5	0	0	121	4.01	37.3	93	30.2	325	13.6	270	7.8	15.9	0.211
P614	PF	0	57	1.027	5.5	11.5	9.8	10	2.1	1.8	1.8	12.2	81.7	12.5	4.4	1.3	0.1	9.94	1.52	0.54	0.16	0.01	136	4.67	41.6	89.1	29.1	327	13.5	319	11	13.6	0.35
P615	PF	1	59	1.017	6.5	6.7	6.3	7.4	1.2	1.1	1.3	4.5	55.5	39.8	4.3	0.2	0.2	2.47	1.77	0.19	0.01	0.01	120	4.15	36.1	87	28.9	332	14.4	229	10.4	12.1	0.24
P616	PF	0	79	1.011	5	0.7	1.2	2.5	0.1	0.2	0.5	10.4	71.2	21	5.4	2.2	0.2	7.41	2.19	0.56	0.23	0.02	130	3.96	38.4	97	32.8	339	14.1	279	10.5	12.6	0.29
P617	PF	0	57	1.018	5	6.5	6.7	1.9	1.2	1.2	0.3	5.5	61	26.2	6.3	6.3	0.2	3.37	1.45	0.35	0.35	0.01	112	4.05	34.8	85.9	27.7	322	16.6	276	8.7	8.9	0.24
P618	PF	1	61	1.017	6.5	3.6	0.8	3	1	0	1	7.8	61.7	31.4	4.7	2.1	0.1	4.81	2.45	0.37	0.15	0.01	132	3.87	39.9	103.1	34.1	331	12.9	277	11.5	13.8	0.32
P619	PF	0	52	1.015	7	4.6	178.6	1.1	1	32	0	10.7	73.1	16.1	8.7	1.9	0.2	7.8	1.72	0.93	0.2	0.02	144	4.64	42.9	92.5	31	336	13.3	255	10.8	12.4	0.27
P620	PF	1	53	1.015	6	7.6	28.3	13	1.4	5.1	2.3	7.6	88.2	8.4	2.5	0.8	0.1	6.58	0.63	0.19	0.06	0.01	77	3.55	26.9	75.8	21.7	286	19.4	72	9.9	11.9	0.31
