# Supplementary material for: Modeling using clinical examination indicators predicts interstitial lung disease among patients with rheumatoid arthritis
Source: PeerJ. 2017 Feb 21;5:e3021. doi: 10.7717/peerj.3021 (PMC5322753; doi:10.7717/peerj.3021)
Supplement: Table S3 [file peerj-05-3021-s003.xlsx]

## Sheet: Sheet1
Table S3. Clinical examination results for the patients included in validation set (n = 218).
Patient number	Lung status	age (year)	WBC (white blood cell count, 109/L)	EO (eosinophil count, 109/L)	PLT (blood platelet count, 109/L)
P0001	Healthy	28	6.49	0.1	305.4
P0002	Healthy	56	8.45	0.2	315
P0003	Healthy	49	4.54	0.12	236
P0004	Healthy	51	3.6	0.04	187
P0005	Healthy	37	3.53	0.07	408.1
P0006	Healthy	39	7.93	0.12	154
P0007	Healthy	60	6.92	0.41	300
P0008	Healthy	35	5.43	0.23	226
P0009	Healthy	27	5.28	0.01	289
P0010	Healthy	54	4.34	0.27	207
P0011	Healthy	41	7.06	0.04	280
P0012	Healthy	62	8.47	0.01	249
P0013	Healthy	65	5.41	0.11	475.4
P0014	Healthy	54	4.63	0.1	245
P0015	Healthy	39	4.9	0.14	187
P0016	Healthy	30	4.26	0.1	223
P0017	Healthy	45	6.06	0.03	311
P0018	Healthy	44	9.96	0.09	293
P0019	Healthy	49	14.82	0.03	330.4
P0020	Healthy	39	3.25	0.09	145
P0021	Healthy	30	8.46	0.08	255
P0022	Healthy	33	5.98	0.08	214
P0023	Healthy	68	11.96	0	191
P0024	Healthy	42	9.15	0.17	231
P0025	Healthy	33	5.68	0.17	206
P0026	Healthy	38	4.72	0.23	336
P0027	Healthy	47	7.54	0.07	197
P0028	Healthy	62	5.64	0.01	266.4
P0029	Healthy	22	5.26	0.08	292
P0030	Healthy	49	9.29	0.39	231.4
P0031	Healthy	61	5.93	0.01	242
P0032	Healthy	38	7.35	0.04	327.4
P0033	Healthy	43	6.4	0.1	240
P0034	Healthy	63	5.42	0.06	343.4
P0035	Healthy	42	8.88	0.06	256
P0036	Healthy	41	7.03	0.04	200
P0037	Healthy	54	5.92	0.21	222
P0038	Healthy	59	5.85	0.08	344.4
P0039	Healthy	47	8.48	0.15	182
P0040	Healthy	40	11.82	0.08	215
P0041	Healthy	55	5.07	0.07	161
P0042	Healthy	52	3.65	0.1	238.4
P0043	Healthy	49	8.52	0.26	198.4
P0044	Healthy	63	9.23	0.05	253
P0045	Healthy	24	5.02	0.26	533.1
P0046	Healthy	77	3.58	0.09	207
P0047	Healthy	67	3.88	0.11	282
P0048	Healthy	43	5.6	0.07	214
P0049	Healthy	48	4.88	0.14	210
P0050	Healthy	20	6.84	0.41	241.4
P0051	Healthy	40	8.06	0.23	353
P0052	Healthy	20	15.19	0.03	345.4
P0053	Healthy	37	6.24	0.25	271
P0054	Healthy	30	6.05	0.43	323
P0055	Healthy	54	5.21	0.15	249.4
P0056	Healthy	57	9.34	0.09	302
P0057	Healthy	47	4.02	0.01	234.4
P0058	Healthy	44	21.85	0	445.1
P0059	Healthy	46	7.07	0.05	338
P0060	Healthy	65	3.83	0	217
P0061	Healthy	34	10.75	0.04	262
P0062	Healthy	59	7.49	0.06	277.4
P0063	Healthy	24	15.51	0.06	410.1
P0064	Healthy	61	6.48	0.03	192
P0065	Healthy	52	6.4	0.29	144
P0066	Healthy	50	19.52	0.11	350.4
P0067	Healthy	35	13.32	0.09	421.4
P0068	Healthy	65	6.54	0.54	228
P0069	Healthy	29	7.49	0.07	303.4
P0070	Healthy	37	5.99	0.05	269.4
P0071	Healthy	27	7.81	0.13	436.1
P0072	Healthy	51	5.46	0.35	278.4
P0073	ILD	75	5.65	0.16	192.9
P0074	ILD	45	6.66	0.08	549.4
P0075	ILD	59	5.63	0.03	65
P0076	ILD	58	5.14	0.22	196
P0077	ILD	44	12.54	0.05	349
P0078	ILD	67	6.9	0.02	277
P0079	ILD	62	7.8	0.17	283
P0080	ILD	46	6.43	0.15	273
P0081	ILD	68	3.22	0.09	185
P0082	ILD	56	5.26	0.11	432.1
P0083	ILD	63	10.97	0.16	421.1
P0084	ILD	41	15.4	0.1	372
P0085	ILD	56	3.61	0.47	227
P0086	ILD	57	10.24	0.02	297.4
P0087	ILD	58	13.94	0.11	313
P0088	ILD	74	7.36	0.04	213
P0089	ILD	85	5.66	0.09	213
P0090	ILD	67	14.42	0.17	254.4
P0091	ILD	60	8.78	0.04	268
P0092	ILD	65	8.69	0.26	221
P0093	ILD	73	9.34	0.1	373
P0094	ILD	56	7.93	0.08	261
P0095	ILD	61	13.22	0.06	165
P0096	ILD	44	6.85	0.37	317
P0097	ILD	60	4.84	0.08	239
P0098	ILD	51	4.18	0.07	387.4
P0099	ILD	50	10.42	0.05	322
P0100	ILD	55	7.35	0.32	284
P0101	ILD	80	16.15	0.07	530
P0102	ILD	83	9	0	204
P0103	ILD	61	4.75	0.07	313
P0104	ILD	70	9.05	0.63	187
P0105	ILD	57	8.63	0.14	376
P0106	ILD	67	9.11	0.23	207.4
P0107	ILD	51	8.28	0.06	244
P0108	ILD	77	8.01	0.07	346
P0109	ILD	62	5.27	0.41	355
P0110	ILD	80	13.82	0.02	265.4
P0111	ILD	56	11.71	0.02	300
P0112	ILD	80	4.32	0.07	91
P0113	ILD	59	7.75	0.13	305
P0114	ILD	52	11.23	0.03	178
P0115	ILD	67	4.87	0.19	192
P0116	ILD	52	8.74	0.09	208
P0117	ILD	60	7.81	0.05	279.4
P0118	ILD	63	6.46	0.1	275
P0119	ILD	46	7.58	0.2	264
P0120	ILD	68	12.27	0.01	279.4
P0121	ILD	52	9.76	0.06	480.1
P0122	ILD	73	9.93	0.15	276
P0123	ILD	60	16.04	0.03	301.4
P0124	ILD	50	7.71	0.31	336
P0125	ILD	65	15.62	0	348
P0126	ILD	57	4.14	0.05	476.1
P0127	ILD	69	4.51	0.04	257.4
P0128	ILD	67	17.89	0.05	371
P0129	ILD	38	12.48	0.03	362.4
P0130	ILD	64	16.48	0.1	366
P0131	ILD	69	7.79	0.16	425.1
P0132	ILD	33	8.09	0.01	199
P0133	ILD	71	14.55	0.09	294
P0134	ILD	58	4.85	0.07	220
P0135	ILD	49	10.25	0.11	306.4
P0136	ILD	45	6.12	0.06	293
P0137	ILD	62	6.19	0.16	437.4
P0138	ILD	65	11.97	0.05	249.4
P0139	ILD	61	5.51	0.11	172
P0140	ILD	60	12.03	0.17	369
P0141	ILD	31	13.07	0.111	283
P0142	ILD	59	12.75	0.2	338
P0143	ILD	60	8.46	0.07	314.4
P0144	ILD	58	4.78	0.09	231.4
P0145	ILD	61	6.89	0.08	448.4
P0146	ILD	46	8.38	0.09	251
P0147	ILD	80	6.38	0.16	248
P0148	ILD	58	10.8	0	251.4
P0149	ILD	70	1.73	0.06	77
P0150	ILD	58	6.28	0.08	195
P0151	ILD	63	6.84	0.15	173
P0152	ILD	75	12.79	0.07	367.4
P0153	ILD	55	7.26	0.35	191.4
P0154	ILD	59	4.49	0.14	322.4
P0155	ILD	58	8.81	0.14	363
P0156	ILD	70	9.62	0.15	299
P0157	ILD	78	8.45	0.06	278
P0158	ILD	75	10.13	0.16	259
P0159	ILD	52	9.45	0	463.1
P0160	ILD	44	8.42	0.11	666.4
P0161	ILD	50	5.68	0.12	204
P0162	ILD	52	4.72	0.11	366.4
P0163	ILD	51	5.95	0.14	402.4
P0164	ILD	70	10.34	0.34	274.3
P0165	ILD	66	3.11	0.03	169.4
P0166	ILD	77	8.64	0.22	357.4
P0167	ILD	57	10.53	0.04	306
P0168	ILD	77	10.16	0.03	186
P0169	ILD	55	12.27	0.07	279
P0170	ILD	66	8.25	0.19	531.1
P0171	ILD	52	7.17	0.05	354
P0172	ILD	56	6.29	0.09	374.4
P0173	ILD	74	5.53	0.12	205.4
P0174	ILD	51	8.65	0.1	202.4
P0175	ILD	58	8.84	0.02	315
P0176	ILD	57	7.85	0.33	307
P0177	ILD	59	5.7	0.03	337
P0178	ILD	58	9.68	0.04	301
P0179	ILD	61	3.68	0	272.4
P0180	ILD	75	9.2	0.06	237.4
P0181	ILD	74	6.8	0.08	216
P0182	ILD	58	4.9	0.03	202
P0183	ILD	61	11.83	0.06	341
P0184	ILD	66	7.82	0.05	291
P0185	ILD	53	8.62	0.01	118
P0186	ILD	59	9.04	0.01	337
P0187	ILD	60	8.27	0.02	101.4
P0188	ILD	76	6.78	0.29	175
P0189	ILD	59	8.43	0.23	137.4
P0190	ILD	77	4.81	0.62	236
P0191	ILD	58	10.52	0.23	236.4
P0192	ILD	54	7.75	0.14	259
P0193	ILD	60	6.35	0.5	213
P0194	ILD	63	6.96	0.03	368
P0195	ILD	47	4.48	0.05	296.4
P0196	ILD	57	4.87	0.19	216
P0197	ILD	66	9.69	0.13	299
P0198	ILD	64	10.17	0.13	339.4
P0199	ILD	59	11.41	0.02	247
P0200	ILD	77	9.37	0.15	323
P0201	ILD	41	5.8	0.19	304
P0202	ILD	55	12.76	0.09	441.1
P0203	ILD	68	6.27	0.43	387.4
P0204	ILD	54	9.94	0.04	324
P0205	ILD	57	6.87	0.12	185
P0206	ILD	74	7.5	0.13	239.4
P0207	ILD	75	5.48	0.01	152.4
P0208	ILD	67	5.01	0.12	315
P0209	ILD	50	8.09	0.23	370
P0210	ILD	61	4.66	0.08	386
P0211	ILD	55	7.95	0.46	299.4
P0212	ILD	52	6.12	0	344
P0213	ILD	77	16.27	0.19	378.4
P0214	ILD	61	8.01	0.34	289.4
P0215	ILD	45	12.53	0.02	219
P0216	ILD	54	4.74	0.04	231
P0217	ILD	48	7.09	0.03	294
P0218	ILD	62	7.2	0.08	141
